# Supplementary material for: Simulation study of the conformation and dynamics of substrate-supported ring and linear polymer films
Source: Royal Society of Chemistry journal article supplement (doi:10.1039/d4cp02794a), 2024-01-01
Supplement: d4cp02794a1.pdf [file d4cp02794a1.pdf]

Supporting Information

## Simulation study of conformation and dynamics of substrate-supported ring and linear polymer films

Jianhua Huang\*, Hongzhu Ji, Jin Zhang, Zhunpeng Wang

*Department of Chemistry, Key Laboratory of Surface & Interface Science of Polymer Materials of Zhejiang Province, Zhejiang Sci-Tech University, Hangzhou 310018, China*

\*Corresponding author: [jhhuang@zstu.edu.cn](mailto:jhhuang@zstu.edu.cn)

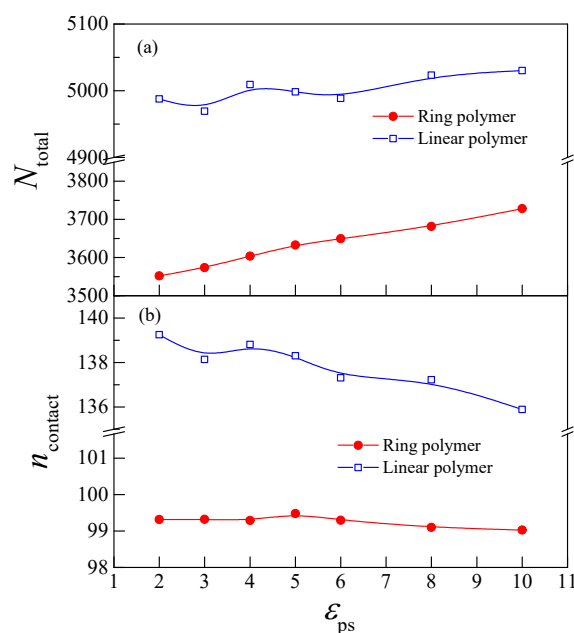

**Fig. S1.** Effect of the substrate attraction strength  $\epsilon_{ps}$  on (a) the total number of monomer-monomer contact pairs,  $N_{total}$ , between adsorbed and non-adsorbed polymer chains, and (b) the number of non-adsorbed polymer chains,  $n_{contact}$ , contact with adsorbed chains for ring and linear polymer films. Polymer length  $N = 32$ .

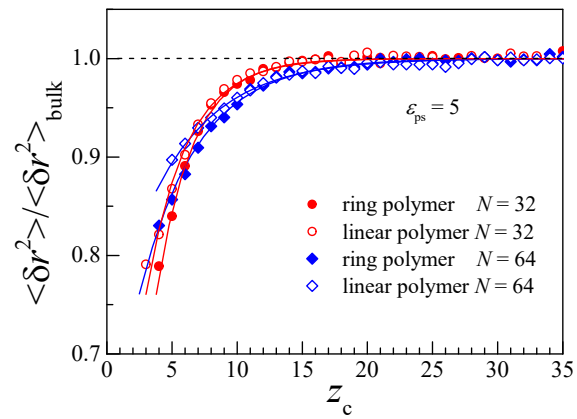

**Fig. S2** Plot of the normalized layer-resolved  $\langle \delta r^2 \rangle / \langle \delta r^2 \rangle_{\text{bulk}}$  of the non-adsorbed chains in both ring and linear polymer films of  $N = 32$  and 64. Substrate attraction strength  $\epsilon_{ps} = 5$ .

## Original simulation data in Figures 2-9 in our manuscript

### 1. Figure 2

| Monomer density profiles at $\epsilon_{ps} = 2$ |           |                                   |           |
|-------------------------------------------------|-----------|-----------------------------------|-----------|
| $\rho(z)$ for ring polymer film                 |           | $\rho(z)$ for linear polymer film |           |
| $z$                                             | $\rho(z)$ | $z$                               | $\rho(z)$ |
| 0.05                                            | 0         | 0.05                              | 0         |
| 0.15                                            | 0         | 0.15                              | 0         |
| 0.25                                            | 0         | 0.25                              | 0         |
| 0.35                                            | 0         | 0.35                              | 0         |
| 0.45                                            | 0         | 0.45                              | 0         |
| 0.55                                            | 0         | 0.55                              | 0         |
| 0.65                                            | 0.005     | 0.65                              | 0.00454   |
| 0.75                                            | 0.819     | 0.75                              | 0.80638   |
| 0.85                                            | 2.26639   | 0.85                              | 2.24495   |
| 0.95                                            | 1.71715   | 0.95                              | 1.70712   |
| 1.05                                            | 1.03863   | 1.05                              | 1.03116   |
| 1.15                                            | 0.68754   | 1.15                              | 0.68126   |
| 1.25                                            | 0.53071   | 1.25                              | 0.524     |
| 1.35                                            | 0.47858   | 1.35                              | 0.46958   |
| 1.45                                            | 0.50552   | 1.45                              | 0.50401   |
| 1.55                                            | 0.6295    | 1.55                              | 0.61897   |
| 1.65                                            | 0.8667    | 1.65                              | 0.84853   |
| 1.75                                            | 1.05913   | 1.75                              | 1.03223   |
| 1.85                                            | 1.01063   | 1.85                              | 0.9967    |
| 1.95                                            | 0.87197   | 1.95                              | 0.86975   |
| 2.05                                            | 0.75605   | 2.05                              | 0.75265   |
| 2.15                                            | 0.68245   | 2.15                              | 0.68293   |
| 2.25                                            | 0.65616   | 2.25                              | 0.65299   |
| 2.35                                            | 0.66856   | 2.35                              | 0.66518   |
| 2.45                                            | 0.71142   | 2.45                              | 0.70739   |
| 2.55                                            | 0.77899   | 2.55                              | 0.76459   |
| 2.65                                            | 0.8343    | 2.65                              | 0.81433   |
| 2.75                                            | 0.84429   | 2.75                              | 0.82764   |
| 2.85                                            | 0.81681   | 2.85                              | 0.8083    |
| 2.95                                            | 0.77617   | 2.95                              | 0.76521   |
| 3.05                                            | 0.74334   | 3.05                              | 0.73937   |
| 3.15                                            | 0.72903   | 3.15                              | 0.72458   |
| 3.25                                            | 0.72667   | 3.25                              | 0.72374   |
| 3.35                                            | 0.7412    | 3.35                              | 0.73054   |
| 3.45                                            | 0.76063   | 3.45                              | 0.7465    |
| 3.55                                            | 0.77329   | 3.55                              | 0.76675   |

|      |         |      |         |
|------|---------|------|---------|
| 3.65 | 0.7814  | 3.65 | 0.77326 |
| 3.75 | 0.77978 | 3.75 | 0.7684  |
| 3.85 | 0.77011 | 3.85 | 0.76216 |
| 3.95 | 0.75689 | 3.95 | 0.75138 |
| 4.05 | 0.75276 | 4.05 | 0.74754 |
| 4.15 | 0.74865 | 4.15 | 0.7436  |
| 4.25 | 0.75294 | 4.25 | 0.74381 |
| 4.35 | 0.76073 | 4.35 | 0.74983 |
| 4.45 | 0.76421 | 4.45 | 0.75561 |
| 4.55 | 0.76426 | 4.55 | 0.75526 |
| 4.65 | 0.7664  | 4.65 | 0.76204 |
| 4.75 | 0.76449 | 4.75 | 0.75668 |
| 4.85 | 0.76156 | 4.85 | 0.756   |
| 4.95 | 0.75841 | 4.95 | 0.74668 |
| 5.05 | 0.7569  | 5.05 | 0.75087 |
| 5.15 | 0.75709 | 5.15 | 0.74714 |
| 5.25 | 0.76085 | 5.25 | 0.7509  |
| 5.35 | 0.7585  | 5.35 | 0.75406 |
| 5.45 | 0.76188 | 5.45 | 0.75299 |
| 5.55 | 0.76095 | 5.55 | 0.75067 |
| 5.65 | 0.7622  | 5.65 | 0.75874 |
| 5.75 | 0.76341 | 5.75 | 0.75234 |
| 5.85 | 0.75765 | 5.85 | 0.75234 |
| 5.95 | 0.75965 | 5.95 | 0.75389 |
| 6.05 | 0.7644  | 6.05 | 0.75197 |
| 6.15 | 0.75749 | 6.15 | 0.75258 |
| 6.25 | 0.75958 | 6.25 | 0.75129 |
| 6.35 | 0.76178 | 6.35 | 0.74837 |
| 6.45 | 0.75986 | 6.45 | 0.75382 |
| 6.55 | 0.76323 | 6.55 | 0.75314 |
| 6.65 | 0.76085 | 6.65 | 0.75022 |
| 6.75 | 0.76202 | 6.75 | 0.75631 |
| 6.85 | 0.75825 | 6.85 | 0.75278 |
| 6.95 | 0.76102 | 6.95 | 0.7574  |
| 7.05 | 0.76167 | 7.05 | 0.75175 |
| 7.15 | 0.75749 | 7.15 | 0.75103 |
| 7.25 | 0.75869 | 7.25 | 0.75301 |
| 7.35 | 0.76234 | 7.35 | 0.74931 |
| 7.45 | 0.76243 | 7.45 | 0.75372 |
| 7.55 | 0.76378 | 7.55 | 0.75403 |
| 7.65 | 0.76093 | 7.65 | 0.75298 |
| 7.75 | 0.76179 | 7.75 | 0.75238 |
| 7.85 | 0.75762 | 7.85 | 0.75232 |

|       |         |       |         |
|-------|---------|-------|---------|
| 7.95  | 0.75953 | 7.95  | 0.75129 |
| 8.05  | 0.76099 | 8.05  | 0.75145 |
| 8.15  | 0.76342 | 8.15  | 0.75303 |
| 8.25  | 0.75742 | 8.25  | 0.75068 |
| 8.35  | 0.76306 | 8.35  | 0.75224 |
| 8.45  | 0.76193 | 8.45  | 0.75262 |
| 8.55  | 0.76079 | 8.55  | 0.75511 |
| 8.65  | 0.7606  | 8.65  | 0.75329 |
| 8.75  | 0.76085 | 8.75  | 0.75136 |
| 8.85  | 0.75939 | 8.85  | 0.74977 |
| 8.95  | 0.76329 | 8.95  | 0.75224 |
| 9.05  | 0.76098 | 9.05  | 0.74983 |
| 9.15  | 0.75997 | 9.15  | 0.75559 |
| 9.25  | 0.75911 | 9.25  | 0.75609 |
| 9.35  | 0.76092 | 9.35  | 0.75098 |
| 9.45  | 0.76143 | 9.45  | 0.75312 |
| 9.55  | 0.76021 | 9.55  | 0.75331 |
| 9.65  | 0.7617  | 9.65  | 0.75083 |
| 9.75  | 0.76347 | 9.75  | 0.75028 |
| 9.85  | 0.76247 | 9.85  | 0.75221 |
| 9.95  | 0.76087 | 9.95  | 0.74984 |
| 10.05 | 0.76052 | 10.05 | 0.75394 |
| 10.15 | 0.75925 | 10.15 | 0.75132 |
| 10.25 | 0.76411 | 10.25 | 0.75365 |
| 10.35 | 0.76097 | 10.35 | 0.75279 |
| 10.45 | 0.75776 | 10.45 | 0.75463 |
| 10.55 | 0.76138 | 10.55 | 0.7499  |
| 10.65 | 0.7614  | 10.65 | 0.75563 |
| 10.75 | 0.76169 | 10.75 | 0.75421 |
| 10.85 | 0.76092 | 10.85 | 0.75226 |
| 10.95 | 0.76144 | 10.95 | 0.75182 |
| 11.05 | 0.76445 | 11.05 | 0.7564  |
| 11.15 | 0.75933 | 11.15 | 0.75065 |
| 11.25 | 0.76099 | 11.25 | 0.74918 |
| 11.35 | 0.76073 | 11.35 | 0.75483 |
| 11.45 | 0.76181 | 11.45 | 0.75035 |
| 11.55 | 0.75863 | 11.55 | 0.75218 |
| 11.65 | 0.76333 | 11.65 | 0.74947 |
| 11.75 | 0.76176 | 11.75 | 0.75296 |
| 11.85 | 0.7621  | 11.85 | 0.75831 |
| 11.95 | 0.76184 | 11.95 | 0.75173 |
| 12.05 | 0.76042 | 12.05 | 0.75443 |
| 12.15 | 0.7611  | 12.15 | 0.75081 |

|       |         |       |         |
|-------|---------|-------|---------|
| 12.25 | 0.7603  | 12.25 | 0.7555  |
| 12.35 | 0.76024 | 12.35 | 0.75216 |
| 12.45 | 0.76203 | 12.45 | 0.75364 |
| 12.55 | 0.75827 | 12.55 | 0.7513  |
| 12.65 | 0.76457 | 12.65 | 0.74742 |
| 12.75 | 0.75944 | 12.75 | 0.75622 |
| 12.85 | 0.76164 | 12.85 | 0.75653 |
| 12.95 | 0.7602  | 12.95 | 0.75165 |
| 13.05 | 0.7607  | 13.05 | 0.75418 |
| 13.15 | 0.75983 | 13.15 | 0.75201 |
| 13.25 | 0.76207 | 13.25 | 0.74923 |
| 13.35 | 0.75928 | 13.35 | 0.75034 |
| 13.45 | 0.76121 | 13.45 | 0.75488 |
| 13.55 | 0.7636  | 13.55 | 0.75232 |
| 13.65 | 0.76242 | 13.65 | 0.75427 |
| 13.75 | 0.76052 | 13.75 | 0.75196 |
| 13.85 | 0.75928 | 13.85 | 0.75258 |
| 13.95 | 0.75798 | 13.95 | 0.75174 |
| 14.05 | 0.7603  | 14.05 | 0.75729 |
| 14.15 | 0.76182 | 14.15 | 0.75309 |
| 14.25 | 0.76073 | 14.25 | 0.75007 |
| 14.35 | 0.76419 | 14.35 | 0.75344 |
| 14.45 | 0.76187 | 14.45 | 0.7537  |
| 14.55 | 0.75938 | 14.55 | 0.7567  |
| 14.65 | 0.76095 | 14.65 | 0.75289 |
| 14.75 | 0.75836 | 14.75 | 0.75041 |
| 14.85 | 0.76309 | 14.85 | 0.75045 |
| 14.95 | 0.76    | 14.95 | 0.74995 |
| 15.05 | 0.76051 | 15.05 | 0.75461 |
| 15.15 | 0.76083 | 15.15 | 0.75131 |
| 15.25 | 0.76195 | 15.25 | 0.74897 |
| 15.35 | 0.76086 | 15.35 | 0.75513 |
| 15.45 | 0.7622  | 15.45 | 0.75202 |
| 15.55 | 0.76055 | 15.55 | 0.75166 |
| 15.65 | 0.75999 | 15.65 | 0.75793 |
| 15.75 | 0.76124 | 15.75 | 0.74954 |
| 15.85 | 0.75794 | 15.85 | 0.75142 |
| 15.95 | 0.76118 | 15.95 | 0.75226 |
| 16.05 | 0.76105 | 16.05 | 0.75358 |
| 16.15 | 0.76302 | 16.15 | 0.75163 |
| 16.25 | 0.7608  | 16.25 | 0.75334 |
| 16.35 | 0.76126 | 16.35 | 0.75259 |
| 16.45 | 0.75864 | 16.45 | 0.75369 |

|       |         |       |         |
|-------|---------|-------|---------|
| 16.55 | 0.7633  | 16.55 | 0.75459 |
| 16.65 | 0.75884 | 16.65 | 0.75127 |
| 16.75 | 0.76118 | 16.75 | 0.75221 |
| 16.85 | 0.7607  | 16.85 | 0.75148 |
| 16.95 | 0.76016 | 16.95 | 0.75514 |
| 17.05 | 0.76129 | 17.05 | 0.75134 |
| 17.15 | 0.76041 | 17.15 | 0.74821 |
| 17.25 | 0.76044 | 17.25 | 0.75127 |
| 17.35 | 0.76279 | 17.35 | 0.75313 |
| 17.45 | 0.76394 | 17.45 | 0.75294 |
| 17.55 | 0.76132 | 17.55 | 0.75295 |
| 17.65 | 0.76243 | 17.65 | 0.75595 |
| 17.75 | 0.75972 | 17.75 | 0.75204 |
| 17.85 | 0.76007 | 17.85 | 0.75717 |
| 17.95 | 0.76297 | 17.95 | 0.75092 |
| 18.05 | 0.75721 | 18.05 | 0.75091 |
| 18.15 | 0.76018 | 18.15 | 0.7532  |
| 18.25 | 0.7611  | 18.25 | 0.75363 |
| 18.35 | 0.76196 | 18.35 | 0.75255 |
| 18.45 | 0.76141 | 18.45 | 0.75406 |
| 18.55 | 0.76126 | 18.55 | 0.75518 |
| 18.65 | 0.76235 | 18.65 | 0.75411 |
| 18.75 | 0.7603  | 18.75 | 0.75306 |
| 18.85 | 0.76086 | 18.85 | 0.74625 |
| 18.95 | 0.76243 | 18.95 | 0.75335 |
| 19.05 | 0.76531 | 19.05 | 0.74803 |
| 19.15 | 0.76021 | 19.15 | 0.75363 |
| 19.25 | 0.75728 | 19.25 | 0.75647 |
| 19.35 | 0.76192 | 19.35 | 0.74967 |
| 19.45 | 0.76183 | 19.45 | 0.75228 |
| 19.55 | 0.7621  | 19.55 | 0.75501 |
| 19.65 | 0.75979 | 19.65 | 0.75244 |
| 19.75 | 0.7589  | 19.75 | 0.75298 |
| 19.85 | 0.76301 | 19.85 | 0.75182 |
| 19.95 | 0.76097 | 19.95 | 0.75051 |
| 20.05 | 0.76177 | 20.05 | 0.75303 |
| 20.15 | 0.75985 | 20.15 | 0.75533 |
| 20.25 | 0.7619  | 20.25 | 0.75151 |
| 20.35 | 0.76018 | 20.35 | 0.75575 |
| 20.45 | 0.75896 | 20.45 | 0.75542 |
| 20.55 | 0.76199 | 20.55 | 0.75246 |
| 20.65 | 0.76084 | 20.65 | 0.75083 |
| 20.75 | 0.76246 | 20.75 | 0.75089 |

|       |         |       |         |
|-------|---------|-------|---------|
| 20.85 | 0.75951 | 20.85 | 0.75471 |
| 20.95 | 0.76281 | 20.95 | 0.75296 |
| 21.05 | 0.75937 | 21.05 | 0.75475 |
| 21.15 | 0.76276 | 21.15 | 0.75143 |
| 21.25 | 0.76066 | 21.25 | 0.75578 |
| 21.35 | 0.76113 | 21.35 | 0.7544  |
| 21.45 | 0.75688 | 21.45 | 0.75025 |
| 21.55 | 0.76195 | 21.55 | 0.75146 |
| 21.65 | 0.7633  | 21.65 | 0.75268 |
| 21.75 | 0.76098 | 21.75 | 0.75514 |
| 21.85 | 0.76078 | 21.85 | 0.75372 |
| 21.95 | 0.76308 | 21.95 | 0.75454 |
| 22.05 | 0.76101 | 22.05 | 0.75314 |
| 22.15 | 0.76222 | 22.15 | 0.75118 |
| 22.25 | 0.76184 | 22.25 | 0.75325 |
| 22.35 | 0.75712 | 22.35 | 0.75253 |
| 22.45 | 0.75928 | 22.45 | 0.75252 |
| 22.55 | 0.76245 | 22.55 | 0.75313 |
| 22.65 | 0.76014 | 22.65 | 0.75201 |
| 22.75 | 0.76106 | 22.75 | 0.75494 |
| 22.85 | 0.76471 | 22.85 | 0.75595 |
| 22.95 | 0.76207 | 22.95 | 0.75406 |
| 23.05 | 0.76066 | 23.05 | 0.7542  |
| 23.15 | 0.75985 | 23.15 | 0.75402 |
| 23.25 | 0.75932 | 23.25 | 0.74879 |
| 23.35 | 0.75939 | 23.35 | 0.74995 |
| 23.45 | 0.76144 | 23.45 | 0.75162 |
| 23.55 | 0.76138 | 23.55 | 0.75012 |
| 23.65 | 0.76189 | 23.65 | 0.75234 |
| 23.75 | 0.76181 | 23.75 | 0.7522  |
| 23.85 | 0.75991 | 23.85 | 0.75589 |
| 23.95 | 0.76212 | 23.95 | 0.75566 |
| 24.05 | 0.76103 | 24.05 | 0.75366 |
| 24.15 | 0.7589  | 24.15 | 0.75428 |
| 24.25 | 0.76171 | 24.25 | 0.75037 |
| 24.35 | 0.7615  | 24.35 | 0.75146 |
| 24.45 | 0.76039 | 24.45 | 0.7521  |
| 24.55 | 0.76089 | 24.55 | 0.75194 |
| 24.65 | 0.75996 | 24.65 | 0.75393 |
| 24.75 | 0.76113 | 24.75 | 0.75108 |
| 24.85 | 0.76136 | 24.85 | 0.75013 |
| 24.95 | 0.76183 | 24.95 | 0.75218 |
| 25.05 | 0.76329 | 25.05 | 0.75339 |



|       |         |       |         |
|-------|---------|-------|---------|
| 25.15 | 0.76205 | 25.15 | 0.75511 |
| 25.25 | 0.76285 | 25.25 | 0.75036 |
| 25.35 | 0.75759 | 25.35 | 0.75387 |
| 25.45 | 0.76209 | 25.45 | 0.75451 |
| 25.55 | 0.76054 | 25.55 | 0.75175 |
| 25.65 | 0.76113 | 25.65 | 0.75331 |
| 25.75 | 0.76272 | 25.75 | 0.74957 |
| 25.85 | 0.76068 | 25.85 | 0.75528 |
| 25.95 | 0.76115 | 25.95 | 0.75263 |
| 26.05 | 0.75987 | 26.05 | 0.75495 |
| 26.15 | 0.762   | 26.15 | 0.75468 |
| 26.25 | 0.7625  | 26.25 | 0.75161 |
| 26.35 | 0.76127 | 26.35 | 0.75396 |
| 26.45 | 0.76159 | 26.45 | 0.74932 |
| 26.55 | 0.76102 | 26.55 | 0.75321 |
| 26.65 | 0.75975 | 26.65 | 0.75416 |
| 26.75 | 0.76194 | 26.75 | 0.75535 |
| 26.85 | 0.76194 | 26.85 | 0.7549  |
| 26.95 | 0.75848 | 26.95 | 0.74855 |
| 27.05 | 0.76456 | 27.05 | 0.7504  |
| 27.15 | 0.76117 | 27.15 | 0.75632 |
| 27.25 | 0.76157 | 27.25 | 0.75206 |
| 27.35 | 0.76173 | 27.35 | 0.75353 |
| 27.45 | 0.76111 | 27.45 | 0.74954 |
| 27.55 | 0.76024 | 27.55 | 0.75394 |
| 27.65 | 0.75975 | 27.65 | 0.75331 |
| 27.75 | 0.76264 | 27.75 | 0.7507  |
| 27.85 | 0.76283 | 27.85 | 0.75587 |
| 27.95 | 0.76327 | 27.95 | 0.75025 |
| 28.05 | 0.75733 | 28.05 | 0.75064 |
| 28.15 | 0.76033 | 28.15 | 0.75179 |
| 28.25 | 0.75778 | 28.25 | 0.75798 |
| 28.35 | 0.76456 | 28.35 | 0.74928 |
| 28.45 | 0.7607  | 28.45 | 0.75421 |
| 28.55 | 0.76097 | 28.55 | 0.75267 |
| 28.65 | 0.76158 | 28.65 | 0.75666 |
| 28.75 | 0.76016 | 28.75 | 0.75149 |
| 28.85 | 0.76028 | 28.85 | 0.7547  |
| 28.95 | 0.76246 | 28.95 | 0.7511  |
| 29.05 | 0.76439 | 29.05 | 0.75487 |
| 29.15 | 0.7615  | 29.15 | 0.75401 |
| 29.25 | 0.76094 | 29.25 | 0.74874 |
| 29.35 | 0.76069 | 29.35 | 0.75487 |

|       |         |       |         |
|-------|---------|-------|---------|
| 29.45 | 0.75761 | 29.45 | 0.75344 |
| 29.55 | 0.76138 | 29.55 | 0.75255 |
| 29.65 | 0.76065 | 29.65 | 0.75265 |
| 29.75 | 0.76244 | 29.75 | 0.75194 |
| 29.85 | 0.76153 | 29.85 | 0.75434 |
| 29.95 | 0.76297 | 29.95 | 0.75322 |
| 30.05 | 0.76075 | 30.05 | 0.75386 |
| 30.15 | 0.76271 | 30.15 | 0.75377 |
| 30.25 | 0.76067 | 30.25 | 0.75252 |
| 30.35 | 0.76031 | 30.35 | 0.75241 |
| 30.45 | 0.75937 | 30.45 | 0.75301 |
| 30.55 | 0.76107 | 30.55 | 0.75558 |
| 30.65 | 0.76258 | 30.65 | 0.7518  |
| 30.75 | 0.76094 | 30.75 | 0.75148 |
| 30.85 | 0.76055 | 30.85 | 0.7527  |
| 30.95 | 0.76133 | 30.95 | 0.75637 |
| 31.05 | 0.76222 | 31.05 | 0.75459 |
| 31.15 | 0.75997 | 31.15 | 0.75267 |
| 31.25 | 0.76521 | 31.25 | 0.7528  |
| 31.35 | 0.75885 | 31.35 | 0.75074 |
| 31.45 | 0.76141 | 31.45 | 0.75267 |
| 31.55 | 0.75691 | 31.55 | 0.752   |
| 31.65 | 0.76374 | 31.65 | 0.75456 |
| 31.75 | 0.76205 | 31.75 | 0.75376 |
| 31.85 | 0.75968 | 31.85 | 0.75127 |
| 31.95 | 0.76512 | 31.95 | 0.75585 |
| 32.05 | 0.76007 | 32.05 | 0.75504 |
| 32.15 | 0.76017 | 32.15 | 0.75667 |
| 32.25 | 0.76169 | 32.25 | 0.75024 |
| 32.35 | 0.76059 | 32.35 | 0.7529  |
| 32.45 | 0.76034 | 32.45 | 0.74883 |
| 32.55 | 0.76312 | 32.55 | 0.75155 |
| 32.65 | 0.7603  | 32.65 | 0.7527  |
| 32.75 | 0.76018 | 32.75 | 0.75388 |
| 32.85 | 0.76155 | 32.85 | 0.75345 |
| 32.95 | 0.76319 | 32.95 | 0.74997 |
| 33.05 | 0.76309 | 33.05 | 0.75574 |
| 33.15 | 0.76017 | 33.15 | 0.75533 |
| 33.25 | 0.76149 | 33.25 | 0.75169 |
| 33.35 | 0.76023 | 33.35 | 0.75341 |
| 33.45 | 0.76009 | 33.45 | 0.74873 |
| 33.55 | 0.75882 | 33.55 | 0.75661 |
| 33.65 | 0.76072 | 33.65 | 0.75403 |

|       |         |       |         |
|-------|---------|-------|---------|
| 33.75 | 0.76069 | 33.75 | 0.75388 |
| 33.85 | 0.76281 | 33.85 | 0.75093 |
| 33.95 | 0.76109 | 33.95 | 0.75046 |
| 34.05 | 0.76206 | 34.05 | 0.75289 |
| 34.15 | 0.76067 | 34.15 | 0.75211 |
| 34.25 | 0.76007 | 34.25 | 0.75491 |
| 34.35 | 0.7631  | 34.35 | 0.7538  |
| 34.45 | 0.76113 | 34.45 | 0.75245 |
| 34.55 | 0.76272 | 34.55 | 0.75433 |
| 34.65 | 0.75828 | 34.65 | 0.75293 |
| 34.75 | 0.76133 | 34.75 | 0.74919 |
| 34.85 | 0.75999 | 34.85 | 0.75287 |
| 34.95 | 0.76238 | 34.95 | 0.75306 |
| 35.05 | 0.76184 | 35.05 | 0.75418 |
| 35.15 | 0.76064 | 35.15 | 0.75307 |
| 35.25 | 0.75819 | 35.25 | 0.75394 |
| 35.35 | 0.76157 | 35.35 | 0.75256 |
| 35.45 | 0.7608  | 35.45 | 0.75559 |
| 35.55 | 0.76228 | 35.55 | 0.75389 |
| 35.65 | 0.76363 | 35.65 | 0.7521  |
| 35.75 | 0.75943 | 35.75 | 0.75267 |
| 35.85 | 0.76522 | 35.85 | 0.75391 |
| 35.95 | 0.76538 | 35.95 | 0.75244 |
| 36.05 | 0.76017 | 36.05 | 0.7527  |
| 36.15 | 0.76013 | 36.15 | 0.75563 |
| 36.25 | 0.75897 | 36.25 | 0.75466 |
| 36.35 | 0.76066 | 36.35 | 0.75107 |
| 36.45 | 0.76075 | 36.45 | 0.7513  |
| 36.55 | 0.76228 | 36.55 | 0.75455 |
| 36.65 | 0.76112 | 36.65 | 0.75482 |
| 36.75 | 0.76171 | 36.75 | 0.74983 |
| 36.85 | 0.76243 | 36.85 | 0.75062 |
| 36.95 | 0.76224 | 36.95 | 0.75287 |
| 37.05 | 0.76056 | 37.05 | 0.75686 |
| 37.15 | 0.76494 | 37.15 | 0.75312 |
| 37.25 | 0.7581  | 37.25 | 0.75389 |
| 37.35 | 0.76185 | 37.35 | 0.75356 |
| 37.45 | 0.76269 | 37.45 | 0.75259 |
| 37.55 | 0.76412 | 37.55 | 0.75155 |
| 37.65 | 0.75936 | 37.65 | 0.75319 |
| 37.75 | 0.75882 | 37.75 | 0.75232 |
| 37.85 | 0.76173 | 37.85 | 0.75317 |
| 37.95 | 0.76311 | 37.95 | 0.75592 |

|       |         |       |         |
|-------|---------|-------|---------|
| 38.05 | 0.76371 | 38.05 | 0.75308 |
| 38.15 | 0.75842 | 38.15 | 0.75506 |
| 38.25 | 0.76225 | 38.25 | 0.75205 |
| 38.35 | 0.76278 | 38.35 | 0.75435 |
| 38.45 | 0.75702 | 38.45 | 0.74763 |
| 38.55 | 0.76266 | 38.55 | 0.74914 |
| 38.65 | 0.76078 | 38.65 | 0.75298 |
| 38.75 | 0.76026 | 38.75 | 0.75377 |
| 38.85 | 0.76155 | 38.85 | 0.75764 |
| 38.95 | 0.75904 | 38.95 | 0.75342 |
| 39.05 | 0.7599  | 39.05 | 0.75156 |
| 39.15 | 0.76172 | 39.15 | 0.75397 |
| 39.25 | 0.76095 | 39.25 | 0.75017 |
| 39.35 | 0.76229 | 39.35 | 0.75501 |
| 39.45 | 0.76117 | 39.45 | 0.75431 |
| 39.55 | 0.7601  | 39.55 | 0.75666 |
| 39.65 | 0.76082 | 39.65 | 0.74961 |
| 39.75 | 0.76193 | 39.75 | 0.75453 |
| 39.85 | 0.76151 | 39.85 | 0.75297 |
| 39.95 | 0.75844 | 39.95 | 0.75217 |
| 40.05 | 0.76096 | 40.05 | 0.75307 |
| 40.15 | 0.76389 | 40.15 | 0.75254 |
| 40.25 | 0.76117 | 40.25 | 0.75228 |
| 40.35 | 0.7592  | 40.35 | 0.75258 |
| 40.45 | 0.75893 | 40.45 | 0.75743 |
| 40.55 | 0.76073 | 40.55 | 0.7503  |
| 40.65 | 0.76062 | 40.65 | 0.75318 |
| 40.75 | 0.76073 | 40.75 | 0.75375 |
| 40.85 | 0.76384 | 40.85 | 0.7568  |
| 40.95 | 0.76226 | 40.95 | 0.75402 |
| 41.05 | 0.76078 | 41.05 | 0.75157 |
| 41.15 | 0.7632  | 41.15 | 0.74993 |
| 41.25 | 0.75721 | 41.25 | 0.75428 |
| 41.35 | 0.76372 | 41.35 | 0.75466 |
| 41.45 | 0.75959 | 41.45 | 0.75732 |
| 41.55 | 0.75814 | 41.55 | 0.75382 |
| 41.65 | 0.76164 | 41.65 | 0.74998 |
| 41.75 | 0.76114 | 41.75 | 0.75307 |
| 41.85 | 0.76168 | 41.85 | 0.75396 |
| 41.95 | 0.76028 | 41.95 | 0.755   |
| 42.05 | 0.76119 | 42.05 | 0.75208 |
| 42.15 | 0.76146 | 42.15 | 0.7504  |
| 42.25 | 0.76115 | 42.25 | 0.75563 |

|       |         |       |         |
|-------|---------|-------|---------|
| 42.35 | 0.763   | 42.35 | 0.75492 |
| 42.45 | 0.76173 | 42.45 | 0.75401 |
| 42.55 | 0.76217 | 42.55 | 0.75482 |
| 42.65 | 0.7592  | 42.65 | 0.75575 |
| 42.75 | 0.75895 | 42.75 | 0.75327 |
| 42.85 | 0.75997 | 42.85 | 0.75107 |
| 42.95 | 0.76317 | 42.95 | 0.74978 |
| 43.05 | 0.76426 | 43.05 | 0.75493 |
| 43.15 | 0.76121 | 43.15 | 0.7516  |
| 43.25 | 0.75982 | 43.25 | 0.74993 |
| 43.35 | 0.76123 | 43.35 | 0.75331 |
| 43.45 | 0.76056 | 43.45 | 0.75448 |
| 43.55 | 0.76275 | 43.55 | 0.75842 |
| 43.65 | 0.76233 | 43.65 | 0.75594 |
| 43.75 | 0.76164 | 43.75 | 0.75478 |
| 43.85 | 0.76199 | 43.85 | 0.7484  |
| 43.95 | 0.76083 | 43.95 | 0.74911 |
| 44.05 | 0.76242 | 44.05 | 0.7529  |
| 44.15 | 0.76166 | 44.15 | 0.74909 |
| 44.25 | 0.76129 | 44.25 | 0.75634 |
| 44.35 | 0.75966 | 44.35 | 0.75153 |
| 44.45 | 0.76291 | 44.45 | 0.75057 |
| 44.55 | 0.76277 | 44.55 | 0.75717 |
| 44.65 | 0.7597  | 44.65 | 0.75494 |
| 44.75 | 0.76077 | 44.75 | 0.75036 |
| 44.85 | 0.76231 | 44.85 | 0.75536 |
| 44.95 | 0.76071 | 44.95 | 0.75662 |
| 45.05 | 0.76326 | 45.05 | 0.75463 |
| 45.15 | 0.76034 | 45.15 | 0.74985 |
| 45.25 | 0.76124 | 45.25 | 0.74948 |
| 45.35 | 0.75961 | 45.35 | 0.75188 |
| 45.45 | 0.76285 | 45.45 | 0.75394 |
| 45.55 | 0.76075 | 45.55 | 0.75459 |
| 45.65 | 0.76226 | 45.65 | 0.75576 |
| 45.75 | 0.76107 | 45.75 | 0.75415 |
| 45.85 | 0.76124 | 45.85 | 0.75618 |
| 45.95 | 0.75986 | 45.95 | 0.75152 |
| 46.05 | 0.76058 | 46.05 | 0.75352 |
| 46.15 | 0.76329 | 46.15 | 0.7523  |
| 46.25 | 0.76185 | 46.25 | 0.75024 |
| 46.35 | 0.7612  | 46.35 | 0.74917 |
| 46.45 | 0.76087 | 46.45 | 0.75521 |
| 46.55 | 0.75972 | 46.55 | 0.75458 |

|       |         |       |         |
|-------|---------|-------|---------|
| 46.65 | 0.76094 | 46.65 | 0.75333 |
| 46.75 | 0.76492 | 46.75 | 0.75301 |
| 46.85 | 0.75993 | 46.85 | 0.75259 |
| 46.95 | 0.7612  | 46.95 | 0.75364 |
| 47.05 | 0.76237 | 47.05 | 0.75347 |
| 47.15 | 0.76176 | 47.15 | 0.75645 |
| 47.25 | 0.76127 | 47.25 | 0.75126 |
| 47.35 | 0.7615  | 47.35 | 0.7511  |
| 47.45 | 0.76055 | 47.45 | 0.75478 |
| 47.55 | 0.76144 | 47.55 | 0.7533  |
| 47.65 | 0.76196 | 47.65 | 0.75005 |
| 47.75 | 0.75878 | 47.75 | 0.75495 |
| 47.85 | 0.75958 | 47.85 | 0.75208 |
| 47.95 | 0.76225 | 47.95 | 0.75567 |
| 48.05 | 0.76303 | 48.05 | 0.7552  |
| 48.15 | 0.76165 | 48.15 | 0.7506  |
| 48.25 | 0.76014 | 48.25 | 0.75299 |
| 48.35 | 0.75863 | 48.35 | 0.75308 |
| 48.45 | 0.75719 | 48.45 | 0.75281 |
| 48.55 | 0.76085 | 48.55 | 0.75127 |
| 48.65 | 0.76217 | 48.65 | 0.75573 |
| 48.75 | 0.761   | 48.75 | 0.75798 |
| 48.85 | 0.76193 | 48.85 | 0.75088 |
| 48.95 | 0.76108 | 48.95 | 0.74886 |
| 49.05 | 0.75814 | 49.05 | 0.75225 |
| 49.15 | 0.75817 | 49.15 | 0.75821 |
| 49.25 | 0.7564  | 49.25 | 0.75248 |
| 49.35 | 0.76124 | 49.35 | 0.7506  |
| 49.45 | 0.75989 | 49.45 | 0.75719 |
| 49.55 | 0.75793 | 49.55 | 0.75319 |
| 49.65 | 0.75883 | 49.65 | 0.75128 |
| 49.75 | 0.75724 | 49.75 | 0.75079 |
| 49.85 | 0.75684 | 49.85 | 0.75089 |
| 49.95 | 0.75359 | 49.95 | 0.75296 |
| 50.05 | 0.75184 | 50.05 | 0.75103 |
| 50.15 | 0.75225 | 50.15 | 0.74945 |
| 50.25 | 0.74969 | 50.25 | 0.74997 |
| 50.35 | 0.74713 | 50.35 | 0.7527  |
| 50.45 | 0.74485 | 50.45 | 0.74723 |
| 50.55 | 0.74241 | 50.55 | 0.74207 |
| 50.65 | 0.73937 | 50.65 | 0.74365 |
| 50.75 | 0.73313 | 50.75 | 0.74346 |
| 50.85 | 0.73023 | 50.85 | 0.74343 |

|       |         |       |         |
|-------|---------|-------|---------|
| 50.95 | 0.72526 | 50.95 | 0.74042 |
| 51.05 | 0.7197  | 51.05 | 0.73509 |
| 51.15 | 0.71223 | 51.15 | 0.7351  |
| 51.25 | 0.70217 | 51.25 | 0.72877 |
| 51.35 | 0.69456 | 51.35 | 0.72197 |
| 51.45 | 0.68283 | 51.45 | 0.72017 |
| 51.55 | 0.67509 | 51.55 | 0.71355 |
| 51.65 | 0.66025 | 51.65 | 0.70801 |
| 51.75 | 0.64373 | 51.75 | 0.69943 |
| 51.85 | 0.63147 | 51.85 | 0.69106 |
| 51.95 | 0.61474 | 51.95 | 0.68337 |
| 52.05 | 0.59902 | 52.05 | 0.67188 |
| 52.15 | 0.57659 | 52.15 | 0.65948 |
| 52.25 | 0.55455 | 52.25 | 0.64543 |
| 52.35 | 0.53573 | 52.35 | 0.62915 |
| 52.45 | 0.51352 | 52.45 | 0.61758 |
| 52.55 | 0.48593 | 52.55 | 0.59793 |
| 52.65 | 0.46114 | 52.65 | 0.58214 |
| 52.75 | 0.4364  | 52.75 | 0.56259 |
| 52.85 | 0.40866 | 52.85 | 0.54207 |
| 52.95 | 0.3856  | 52.95 | 0.51637 |
| 53.05 | 0.35514 | 53.05 | 0.49579 |
| 53.15 | 0.32849 | 53.15 | 0.47052 |
| 53.25 | 0.30295 | 53.25 | 0.44582 |
| 53.35 | 0.27822 | 53.35 | 0.42273 |
| 53.45 | 0.25367 | 53.45 | 0.39574 |
| 53.55 | 0.22761 | 53.55 | 0.36949 |
| 53.65 | 0.20389 | 53.65 | 0.34157 |
| 53.75 | 0.18415 | 53.75 | 0.31964 |
| 53.85 | 0.16331 | 53.85 | 0.29318 |
| 53.95 | 0.14274 | 53.95 | 0.26725 |
| 54.05 | 0.12497 | 54.05 | 0.24317 |
| 54.15 | 0.11001 | 54.15 | 0.22065 |
| 54.25 | 0.09665 | 54.25 | 0.19837 |
| 54.35 | 0.08134 | 54.35 | 0.17793 |
| 54.45 | 0.06983 | 54.45 | 0.15829 |
| 54.55 | 0.05919 | 54.55 | 0.13987 |
| 54.65 | 0.05021 | 54.65 | 0.12284 |
| 54.75 | 0.04179 | 54.75 | 0.10754 |
| 54.85 | 0.03522 | 54.85 | 0.09302 |
| 54.95 | 0.02973 | 54.95 | 0.08042 |
| 55.05 | 0.02449 | 55.05 | 0.0687  |
| 55.15 | 0.01971 | 55.15 | 0.05905 |

|       |          |       |          |
|-------|----------|-------|----------|
| 55.25 | 0.01609  | 55.25 | 0.05023  |
| 55.35 | 0.01362  | 55.35 | 0.04287  |
| 55.45 | 0.01072  | 55.45 | 0.03564  |
| 55.55 | 0.00868  | 55.55 | 0.0306   |
| 55.65 | 0.00679  | 55.65 | 0.02464  |
| 55.75 | 0.00532  | 55.75 | 0.0206   |
| 55.85 | 0.00437  | 55.85 | 0.01776  |
| 55.95 | 0.00338  | 55.95 | 0.01396  |
| 56.05 | 0.0025   | 56.05 | 0.01181  |
| 56.15 | 0.00184  | 56.15 | 0.00904  |
| 56.25 | 0.00154  | 56.25 | 0.00776  |
| 56.35 | 0.00116  | 56.35 | 0.00614  |
| 56.45 | 0.001    | 56.45 | 0.0049   |
| 56.55 | 7.01E-04 | 56.55 | 0.00399  |
| 56.65 | 5.65E-04 | 56.65 | 0.00324  |
| 56.75 | 3.99E-04 | 56.75 | 0.00269  |
| 56.85 | 3.17E-04 | 56.85 | 0.00188  |
| 56.95 | 2.62E-04 | 56.95 | 0.00168  |
| 57.05 | 1.85E-04 | 57.05 | 0.00118  |
| 57.15 | 1.22E-04 | 57.15 | 0.00103  |
| 57.25 | 9.97E-05 | 57.25 | 6.70E-04 |
| 57.35 | 7.75E-05 | 57.35 | 7.34E-04 |
| 57.45 | 4.06E-05 | 57.45 | 4.49E-04 |
| 57.55 | 2.22E-05 | 57.55 | 4.81E-04 |
| 57.65 | 2.95E-05 | 57.65 | 3.79E-04 |
| 57.75 | 1.48E-05 | 57.75 | 2.15E-04 |
| 57.85 | 1.48E-05 | 57.85 | 1.64E-04 |
| 57.95 | 1.11E-05 | 57.95 | 1.64E-04 |
| 58.05 | 3.69E-06 | 58.05 | 1.33E-04 |
| 58.15 | 7.38E-06 | 58.15 | 8.85E-05 |
|       |          | 58.25 | 8.85E-05 |
|       |          | 58.35 | 4.43E-05 |
|       |          | 58.45 | 6.32E-05 |
|       |          | 58.55 | 3.79E-05 |
|       |          | 58.65 | 1.27E-05 |
|       |          | 58.75 | 1.90E-05 |
|       |          | 58.85 | 3.16E-05 |
|       |          | 58.95 | 2.53E-05 |
|       |          | 59.05 | 6.32E-06 |
|       |          | 59.15 | 0        |
|       |          | 59.25 | 2.53E-05 |
|       |          | 59.35 | 1.27E-05 |
|       |          | 59.45 | 1.90E-05 |



|  |  |       |          |
|--|--|-------|----------|
|  |  | 59.55 | 0        |
|  |  | 59.65 | 1.90E-05 |
|  |  | 59.75 | 0        |
|  |  | 59.85 | 6.32E-06 |
|  |  | 59.95 | 6.32E-06 |

## 2. The inset in Figure 2

| Monomer density $\rho(z)$ for ring polymers near the substrate |           |                      |           |
|----------------------------------------------------------------|-----------|----------------------|-----------|
| $\epsilon_{ps} = 2$                                            |           | $\epsilon_{ps} = 10$ |           |
| $z$                                                            | $\rho(z)$ | $z$                  | $\rho(z)$ |
| 0.05                                                           | 0         | 0.05                 | 0         |
| 0.15                                                           | 0         | 0.15                 | 0         |
| 0.25                                                           | 0         | 0.25                 | 0         |
| 0.35                                                           | 0         | 0.35                 | 0         |
| 0.45                                                           | 0         | 0.45                 | 0         |
| 0.55                                                           | 0         | 0.55                 | 0         |
| 0.65                                                           | 0.005     | 0.65                 | 0         |
| 0.75                                                           | 0.819     | 0.75                 | 0.47078   |
| 0.85                                                           | 2.26639   | 0.85                 | 7.40713   |
| 0.95                                                           | 1.71715   | 0.95                 | 2.34983   |
| 1.05                                                           | 1.03863   | 1.05                 | 0.24012   |
| 1.15                                                           | 0.68754   | 1.15                 | 0.03886   |
| 1.25                                                           | 0.53071   | 1.25                 | 0.01291   |
| 1.35                                                           | 0.47858   | 1.35                 | 0.00833   |
| 1.45                                                           | 0.50552   | 1.45                 | 0.02064   |
| 1.55                                                           | 0.6295    | 1.55                 | 0.25376   |
| 1.65                                                           | 0.8667    | 1.65                 | 1.5147    |
| 1.75                                                           | 1.05913   | 1.75                 | 2.45557   |
| 1.85                                                           | 1.01063   | 1.85                 | 1.71625   |
| 1.95                                                           | 0.87197   | 1.95                 | 0.94793   |
| 2.05                                                           | 0.75605   | 2.05                 | 0.55182   |
| 2.15                                                           | 0.68245   | 2.15                 | 0.38893   |
| 2.25                                                           | 0.65616   | 2.25                 | 0.35339   |
| 2.35                                                           | 0.66856   | 2.35                 | 0.41443   |
| 2.45                                                           | 0.71142   | 2.45                 | 0.59823   |
| 2.55                                                           | 0.77899   | 2.55                 | 0.90093   |
| 2.65                                                           | 0.8343    | 2.65                 | 1.12832   |
| 2.75                                                           | 0.84429   | 2.75                 | 1.07922   |
| 2.85                                                           | 0.81681   | 2.85                 | 0.902     |
| 2.95                                                           | 0.77617   | 2.95                 | 0.74729   |
| 3.05                                                           | 0.74334   | 3.05                 | 0.64949   |
| 3.15                                                           | 0.72903   | 3.15                 | 0.62066   |
| 3.25                                                           | 0.72667   | 3.25                 | 0.64301   |

|      |         |      |         |
|------|---------|------|---------|
| 3.35 | 0.7412  | 3.35 | 0.70919 |
| 3.45 | 0.76063 | 3.45 | 0.78944 |
| 3.55 | 0.77329 | 3.55 | 0.84794 |
| 3.65 | 0.7814  | 3.65 | 0.85234 |
| 3.75 | 0.77978 | 3.75 | 0.81636 |
| 3.85 | 0.77011 | 3.85 | 0.7672  |
| 3.95 | 0.75689 | 3.95 | 0.73099 |
| 4.05 | 0.75276 | 4.05 | 0.71325 |
| 4.15 | 0.74865 | 4.15 | 0.72122 |
| 4.25 | 0.75294 | 4.25 | 0.74084 |
| 4.35 | 0.76073 | 4.35 | 0.76452 |
| 4.45 | 0.76421 | 4.45 | 0.78023 |
| 4.55 | 0.76426 | 4.55 | 0.78686 |
| 4.65 | 0.7664  | 4.65 | 0.77828 |
| 4.75 | 0.76449 | 4.75 | 0.76767 |
| 4.85 | 0.76156 | 4.85 | 0.75519 |
| 4.95 | 0.75841 | 4.95 | 0.74642 |

### 3. Figure 3

| Effect of the substrate attraction strength $\epsilon_{ps}$ |         |         |                           |         |         |                 |         |         |
|-------------------------------------------------------------|---------|---------|---------------------------|---------|---------|-----------------|---------|---------|
| $\langle n_{p,ads} \rangle$                                 |         |         | $\langle M_{ads} \rangle$ |         |         | $\rho_c$        |         |         |
| $\epsilon_{ps}$                                             | ring    | linear  | $\epsilon_{ps}$           | ring    | linear  | $\epsilon_{ps}$ | ring    | linear  |
| 2                                                           | 72.8056 | 82.3167 | 2                         | 8.7328  | 7.6496  | 2               | 0.70644 | 0.69965 |
| 3                                                           | 74.7703 | 83.8826 | 3                         | 9.6478  | 8.55156 | 3               | 0.80152 | 0.79703 |
| 4                                                           | 75.2975 | 84.5422 | 4                         | 10.2771 | 9.1178  | 4               | 0.85982 | 0.85649 |
| 5                                                           | 76.1898 | 85.6329 | 5                         | 10.6384 | 9.4375  | 5               | 0.9006  | 0.89795 |
| 6                                                           | 76.493  | 85.6665 | 6                         | 10.9669 | 9.769   | 6               | 0.9321  | 0.92987 |
| 8                                                           | 77.7635 | 86.3697 | 8                         | 11.3495 | 10.1989 | 8               | 0.98064 | 0.97875 |
| 10                                                          | 77.5279 | 86.2343 | 10                        | 12.2108 | 10.9632 | 10              | 1.05186 | 1.05045 |

### 4. Figure 4

| The ratio $\langle R_{g,z}^2 \rangle / \langle R_{g,xy}^2 \rangle$ for adsorbed chains |         |         | The ratio $\langle R_{g,z}^2 \rangle / \langle R_{g,xy}^2 \rangle$ for non-adsorbed chains |         |         |
|----------------------------------------------------------------------------------------|---------|---------|--------------------------------------------------------------------------------------------|---------|---------|
| $z_c$                                                                                  | ring    | linear  | $z_c$                                                                                      | ring    | linear  |
| 1                                                                                      |         |         | 1                                                                                          |         |         |
| 2                                                                                      | 0.1535  | 0.09324 | 2                                                                                          |         |         |
| 3                                                                                      | 0.46676 | 0.29171 | 3                                                                                          | 0.15413 | 0.08417 |
| 4                                                                                      | 0.83495 | 0.58314 | 4                                                                                          | 0.31253 | 0.18764 |
| 5                                                                                      | 1.48558 | 1.00653 | 5                                                                                          | 0.44055 | 0.30149 |
| 6                                                                                      |         | 1.54212 | 6                                                                                          | 0.48987 | 0.39935 |
| 7                                                                                      |         | 2.19998 | 7                                                                                          | 0.50166 | 0.46007 |
|                                                                                        |         |         | 8                                                                                          | 0.50335 | 0.49243 |
|                                                                                        |         |         | 9                                                                                          | 0.50088 | 0.50226 |
|                                                                                        |         |         | 10                                                                                         | 0.50088 | 0.4997  |
|                                                                                        |         |         | 11                                                                                         | 0.50233 | 0.5054  |
|                                                                                        |         |         | 12                                                                                         | 0.50021 | 0.50212 |
|                                                                                        |         |         | 13                                                                                         | 0.50056 | 0.50144 |
|                                                                                        |         |         | 14                                                                                         | 0.50101 | 0.4989  |
|                                                                                        |         |         | 15                                                                                         | 0.49795 | 0.49781 |
|                                                                                        |         |         | 16                                                                                         | 0.49694 | 0.49669 |
|                                                                                        |         |         | 17                                                                                         | 0.50003 | 0.49805 |
|                                                                                        |         |         | 18                                                                                         | 0.49867 | 0.49652 |
|                                                                                        |         |         | 19                                                                                         | 0.49875 | 0.49862 |
|                                                                                        |         |         | 20                                                                                         | 0.49972 | 0.50053 |

### 5. The inset in Figure 4

| layer-resolved $\langle R_{g,z}^2 \rangle$ , $\langle R_{g,xy}^2 \rangle$ , and $\langle M_{ads} \rangle$ for the adsorbed ring chains |                              |                             |                           |
|----------------------------------------------------------------------------------------------------------------------------------------|------------------------------|-----------------------------|---------------------------|
| $z_c$                                                                                                                                  | $\langle R_{g,xy}^2 \rangle$ | $\langle R_{g,z}^2 \rangle$ | $\langle M_{ads} \rangle$ |
| 2                                                                                                                                      | 3.80895                      | 0.58466                     | 15.4664                   |
| 3                                                                                                                                      | 2.97996                      | 1.39093                     | 7.48998                   |
| 4                                                                                                                                      | 2.64676                      | 2.20992                     | 3.73934                   |
| 5                                                                                                                                      | 2.30475                      | 3.42388                     | 2.40505                   |

## 6. Figure 5

| Evolution of the fraction of the remaining adsorbed chains, $C(t)$ , with time |                        |         |                        |         |                        |         |                         |         |
|--------------------------------------------------------------------------------|------------------------|---------|------------------------|---------|------------------------|---------|-------------------------|---------|
|                                                                                | $\varepsilon_{ps} = 2$ |         | $\varepsilon_{ps} = 5$ |         | $\varepsilon_{ps} = 8$ |         | $\varepsilon_{ps} = 10$ |         |
| $t$                                                                            | ring                   | linear  | ring                   | linear  | ring                   | linear  | ring                    | linear  |
| 0                                                                              | 1                      | 1       | 1                      | 1       | 1                      | 1       | 1                       | 1       |
| 20                                                                             | 0.95287                | 0.93075 | 0.98244                | 0.9746  | 0.99394                | 0.99123 | 0.99885                 | 0.99814 |
| 40                                                                             | 0.93183                | 0.90322 | 0.97201                | 0.95975 | 0.98996                | 0.98496 | 0.99814                 | 0.9969  |
| 60                                                                             | 0.91546                | 0.88403 | 0.96348                | 0.94808 | 0.98652                | 0.97963 | 0.99759                 | 0.99586 |
| 80                                                                             | 0.90191                | 0.8686  | 0.95611                | 0.9385  | 0.98336                | 0.97486 | 0.9971                  | 0.99492 |
| 100                                                                            | 0.89006                | 0.85602 | 0.94929                | 0.93016 | 0.98045                | 0.97044 | 0.99668                 | 0.99404 |
| 120                                                                            | 0.87938                | 0.84538 | 0.94305                | 0.92261 | 0.97768                | 0.96641 | 0.9963                  | 0.99323 |
| 140                                                                            | 0.86924                | 0.83557 | 0.93727                | 0.91566 | 0.97508                | 0.96249 | 0.99597                 | 0.9925  |
| 160                                                                            | 0.86011                | 0.82664 | 0.93186                | 0.90936 | 0.97257                | 0.95888 | 0.99566                 | 0.99182 |
| 180                                                                            | 0.85164                | 0.81863 | 0.92672                | 0.90352 | 0.97017                | 0.95548 | 0.99535                 | 0.99119 |
| 200                                                                            | 0.84346                | 0.81034 | 0.92182                | 0.89788 | 0.9678                 | 0.9523  | 0.99507                 | 0.99058 |
| 220                                                                            | 0.83539                | 0.80311 | 0.91713                | 0.89252 | 0.9655                 | 0.94925 | 0.99481                 | 0.98999 |
| 240                                                                            | 0.82783                | 0.79624 | 0.91256                | 0.88757 | 0.96333                | 0.94625 | 0.99456                 | 0.98944 |
| 260                                                                            | 0.8204                 | 0.7896  | 0.9081                 | 0.88274 | 0.9612                 | 0.94344 | 0.99431                 | 0.98887 |
| 280                                                                            | 0.81332                | 0.78369 | 0.90382                | 0.87799 | 0.95912                | 0.9407  | 0.99405                 | 0.98835 |
| 300                                                                            | 0.8067                 | 0.77756 | 0.89972                | 0.8735  | 0.9571                 | 0.93801 | 0.99381                 | 0.98783 |
| 320                                                                            | 0.7999                 | 0.77198 | 0.89579                | 0.86922 | 0.95512                | 0.93545 | 0.99354                 | 0.98733 |
| 340                                                                            | 0.7934                 | 0.76619 | 0.89192                | 0.86497 | 0.95318                | 0.93302 | 0.99329                 | 0.98683 |
| 360                                                                            | 0.78709                | 0.76053 | 0.88826                | 0.86084 | 0.95129                | 0.93063 | 0.99304                 | 0.98634 |
| 380                                                                            | 0.781                  | 0.75528 | 0.88472                | 0.85702 | 0.94945                | 0.9283  | 0.9928                  | 0.98585 |
| 400                                                                            | 0.77502                | 0.75031 | 0.88121                | 0.85314 | 0.9476                 | 0.926   | 0.99257                 | 0.98536 |
| 420                                                                            | 0.76938                | 0.74574 | 0.87764                | 0.8494  | 0.94576                | 0.92373 | 0.99236                 | 0.9849  |
| 440                                                                            | 0.76365                | 0.74076 | 0.87417                | 0.84591 | 0.94398                | 0.92152 | 0.99214                 | 0.98445 |
| 460                                                                            | 0.75802                | 0.7361  | 0.87075                | 0.84237 | 0.94223                | 0.91939 | 0.99194                 | 0.98402 |
| 480                                                                            | 0.75265                | 0.73197 | 0.86729                | 0.83894 | 0.94048                | 0.91731 | 0.99174                 | 0.9836  |
| 500                                                                            | 0.74724                | 0.72767 | 0.86378                | 0.83555 | 0.93874                | 0.91535 | 0.99154                 | 0.98319 |
| 520                                                                            | 0.74206                | 0.72397 | 0.86049                | 0.8322  | 0.937                  | 0.91339 | 0.99134                 | 0.98278 |
| 540                                                                            | 0.73688                | 0.72022 | 0.85722                | 0.82901 | 0.93528                | 0.91153 | 0.99114                 | 0.98238 |
| 560                                                                            | 0.73175                | 0.71663 | 0.85394                | 0.82593 | 0.93358                | 0.90961 | 0.99095                 | 0.98196 |
| 580                                                                            | 0.72645                | 0.71309 | 0.85073                | 0.82292 | 0.93193                | 0.90778 | 0.99074                 | 0.98153 |
| 600                                                                            | 0.72138                | 0.709   | 0.84749                | 0.81999 | 0.93028                | 0.90595 | 0.99054                 | 0.98111 |
| 620                                                                            | 0.71643                | 0.70499 | 0.84431                | 0.81707 | 0.92868                | 0.9042  | 0.99034                 | 0.98072 |
| 640                                                                            | 0.71178                | 0.70127 | 0.84121                | 0.81421 | 0.92709                | 0.90247 | 0.99013                 | 0.98032 |
| 660                                                                            | 0.70713                | 0.69794 | 0.83817                | 0.81144 | 0.92552                | 0.90079 | 0.98993                 | 0.97992 |
| 680                                                                            | 0.70262                | 0.69417 | 0.83517                | 0.80856 | 0.924                  | 0.89911 | 0.98973                 | 0.97952 |
| 700                                                                            | 0.69816                | 0.6907  | 0.83224                | 0.8057  | 0.92247                | 0.89741 | 0.98954                 | 0.97914 |
| 720                                                                            | 0.69372                | 0.68685 | 0.82928                | 0.80291 | 0.92096                | 0.89574 | 0.98934                 | 0.97874 |
| 740                                                                            | 0.68944                | 0.68372 | 0.82632                | 0.80017 | 0.91947                | 0.89409 | 0.98914                 | 0.97835 |

|      |         |         |         |         |         |         |         |         |
|------|---------|---------|---------|---------|---------|---------|---------|---------|
| 760  | 0.68513 | 0.68032 | 0.82342 | 0.79748 | 0.91794 | 0.8924  | 0.98894 | 0.97799 |
| 780  | 0.6809  | 0.677   | 0.82054 | 0.79488 | 0.91643 | 0.89077 | 0.98874 | 0.97763 |
| 800  | 0.67665 | 0.67349 | 0.81775 | 0.7923  | 0.91497 | 0.88917 | 0.98854 | 0.97726 |
| 820  | 0.67253 | 0.67021 | 0.81495 | 0.78982 | 0.91351 | 0.88756 | 0.98834 | 0.97691 |
| 840  | 0.66839 | 0.66723 | 0.81219 | 0.78728 | 0.91209 | 0.88599 | 0.98814 | 0.97656 |
| 860  | 0.66435 | 0.66399 | 0.80946 | 0.78476 | 0.91064 | 0.88444 | 0.98794 | 0.97622 |
| 880  | 0.66017 | 0.6612  | 0.80678 | 0.78245 | 0.90924 | 0.88291 | 0.98775 | 0.97587 |
| 900  | 0.65631 | 0.65807 | 0.80423 | 0.77999 | 0.90781 | 0.88133 | 0.98755 | 0.97552 |
| 920  | 0.6522  | 0.65496 | 0.80166 | 0.7776  | 0.9064  | 0.8798  | 0.98736 | 0.97518 |
| 940  | 0.64816 | 0.65177 | 0.7991  | 0.77511 | 0.905   | 0.87821 | 0.98718 | 0.97488 |
| 960  | 0.64434 | 0.64886 | 0.7966  | 0.77266 | 0.90366 | 0.8767  | 0.98699 | 0.97457 |
| 980  | 0.64059 | 0.64575 | 0.79415 | 0.77024 | 0.90229 | 0.87524 | 0.98681 | 0.97426 |
| 1000 | 0.63679 | 0.64316 | 0.79173 | 0.76792 | 0.90094 | 0.87377 | 0.98663 | 0.97395 |
| 1020 | 0.63301 | 0.64008 | 0.78924 | 0.76554 | 0.89963 | 0.87232 | 0.98646 | 0.97365 |
| 1040 | 0.62912 | 0.63751 | 0.7868  | 0.76309 | 0.89834 | 0.87089 | 0.98629 | 0.97335 |
| 1060 | 0.62564 | 0.63484 | 0.78434 | 0.76069 | 0.89707 | 0.86949 | 0.98612 | 0.97306 |
| 1080 | 0.62222 | 0.63242 | 0.78192 | 0.75844 | 0.89581 | 0.86808 | 0.98596 | 0.97276 |
| 1100 | 0.61848 | 0.62975 | 0.77955 | 0.7562  | 0.89455 | 0.86668 | 0.98579 | 0.97248 |
| 1120 | 0.6149  | 0.62736 | 0.7772  | 0.75392 | 0.8933  | 0.86528 | 0.98562 | 0.97221 |
| 1140 | 0.61139 | 0.62503 | 0.77483 | 0.75165 | 0.89207 | 0.86385 | 0.98544 | 0.97193 |
| 1160 | 0.60794 | 0.62287 | 0.77248 | 0.74935 | 0.89086 | 0.86241 | 0.98527 | 0.97164 |
| 1180 | 0.60459 | 0.62083 | 0.7701  | 0.74705 | 0.88967 | 0.86094 | 0.9851  | 0.97134 |
| 1200 | 0.60115 | 0.61834 | 0.76779 | 0.74484 | 0.8885  | 0.85953 | 0.98493 | 0.97104 |
| 1220 | 0.59774 | 0.6162  | 0.76548 | 0.74268 | 0.88732 | 0.85812 | 0.98476 | 0.97075 |
| 1240 | 0.59451 | 0.6139  | 0.76316 | 0.7405  | 0.88613 | 0.85671 | 0.98459 | 0.97044 |
| 1260 | 0.59135 | 0.6114  | 0.76086 | 0.73837 | 0.88494 | 0.85534 | 0.98441 | 0.97015 |
| 1280 | 0.58827 | 0.6088  | 0.75858 | 0.73617 | 0.88374 | 0.85395 | 0.98423 | 0.96986 |
| 1300 | 0.58519 | 0.60639 | 0.7563  | 0.73398 | 0.88256 | 0.85266 | 0.98406 | 0.96958 |
| 1320 | 0.58194 | 0.60401 | 0.75399 | 0.73184 | 0.88141 | 0.85136 | 0.98389 | 0.9693  |
| 1340 | 0.57876 | 0.60144 | 0.75165 | 0.72977 | 0.88025 | 0.85    | 0.98372 | 0.96899 |
| 1360 | 0.57561 | 0.59891 | 0.74935 | 0.72752 | 0.87912 | 0.84871 | 0.98355 | 0.9687  |
| 1380 | 0.57288 | 0.59634 | 0.74703 | 0.72537 | 0.87798 | 0.84737 | 0.98338 | 0.96839 |
| 1400 | 0.56984 | 0.59389 | 0.74474 | 0.72322 | 0.87684 | 0.84604 | 0.98321 | 0.96809 |
| 1420 | 0.56737 | 0.59177 | 0.74255 | 0.72122 | 0.8757  | 0.84479 | 0.98304 | 0.96782 |
| 1440 | 0.56473 | 0.58917 | 0.74039 | 0.71925 | 0.87458 | 0.84348 | 0.98288 | 0.96752 |
| 1460 | 0.56196 | 0.5869  | 0.73816 | 0.71732 | 0.87346 | 0.84228 | 0.98271 | 0.96724 |
| 1480 | 0.55913 | 0.58463 | 0.73601 | 0.71534 | 0.87236 | 0.841   | 0.98253 | 0.96698 |
| 1500 | 0.55623 | 0.58222 | 0.73382 | 0.71341 | 0.87125 | 0.83974 | 0.98236 | 0.96675 |
| 1520 | 0.55353 | 0.57971 | 0.73165 | 0.71156 | 0.87016 | 0.8384  | 0.98219 | 0.96651 |
| 1540 | 0.55098 | 0.57765 | 0.72947 | 0.70969 | 0.86908 | 0.8371  | 0.98201 | 0.96628 |
| 1560 | 0.54815 | 0.57534 | 0.72734 | 0.70786 | 0.86799 | 0.83577 | 0.98184 | 0.96604 |
| 1580 | 0.54551 | 0.57316 | 0.72511 | 0.70604 | 0.8669  | 0.83445 | 0.98166 | 0.96582 |
| 1600 | 0.54304 | 0.57083 | 0.72297 | 0.70428 | 0.86579 | 0.83319 | 0.98148 | 0.96561 |

|      |         |         |         |         |         |         |         |         |
|------|---------|---------|---------|---------|---------|---------|---------|---------|
| 1620 | 0.54065 | 0.56884 | 0.72083 | 0.70256 | 0.86469 | 0.83193 | 0.98131 | 0.96539 |
| 1640 | 0.53807 | 0.5672  | 0.71877 | 0.70093 | 0.86361 | 0.83062 | 0.98113 | 0.96516 |
| 1660 | 0.5355  | 0.56551 | 0.71678 | 0.69925 | 0.8625  | 0.82932 | 0.98095 | 0.96493 |
| 1680 | 0.53305 | 0.56352 | 0.71483 | 0.69748 | 0.86137 | 0.82802 | 0.98076 | 0.96466 |
| 1700 | 0.53061 | 0.56131 | 0.71289 | 0.69569 | 0.86025 | 0.82673 | 0.98059 | 0.96441 |
| 1720 | 0.52822 | 0.55928 | 0.71101 | 0.69393 | 0.85915 | 0.82546 | 0.98041 | 0.96415 |
| 1740 | 0.52577 | 0.55708 | 0.70913 | 0.69212 | 0.85806 | 0.82425 | 0.98023 | 0.96391 |
| 1760 | 0.52378 | 0.55538 | 0.70717 | 0.69039 | 0.85696 | 0.82306 | 0.98005 | 0.96367 |
| 1780 | 0.52172 | 0.55344 | 0.70519 | 0.6886  | 0.85584 | 0.82183 | 0.97987 | 0.96343 |
| 1800 | 0.51974 | 0.55134 | 0.70322 | 0.68683 | 0.85476 | 0.82061 | 0.9797  | 0.96317 |
| 1820 | 0.51751 | 0.54927 | 0.70126 | 0.68509 | 0.85368 | 0.81941 | 0.97952 | 0.96291 |
| 1840 | 0.51555 | 0.5478  | 0.6993  | 0.68338 | 0.85262 | 0.81821 | 0.97934 | 0.96267 |
| 1860 | 0.51364 | 0.54614 | 0.69735 | 0.68165 | 0.85152 | 0.81693 | 0.97916 | 0.96243 |
| 1880 | 0.51165 | 0.54442 | 0.69546 | 0.67992 | 0.85047 | 0.81569 | 0.97899 | 0.96217 |
| 1900 | 0.50958 | 0.54302 | 0.69353 | 0.67811 | 0.8494  | 0.81445 | 0.97882 | 0.9619  |
| 1920 | 0.50747 | 0.54115 | 0.69159 | 0.67632 | 0.84831 | 0.81322 | 0.97866 | 0.96163 |
| 1940 | 0.50556 | 0.53923 | 0.6897  | 0.67463 | 0.84725 | 0.81197 | 0.9785  | 0.96137 |
| 1960 | 0.50347 | 0.5371  | 0.68784 | 0.67297 | 0.8462  | 0.81076 | 0.97835 | 0.9611  |
| 1980 | 0.50125 | 0.53513 | 0.68595 | 0.67139 | 0.84516 | 0.80951 | 0.97819 | 0.96082 |
| 2000 | 0.49934 | 0.53333 | 0.68413 | 0.66977 | 0.84413 | 0.80829 | 0.97803 | 0.96055 |
| 2020 | 0.4973  | 0.53169 | 0.68231 | 0.66815 | 0.84308 | 0.8071  | 0.97787 | 0.96028 |
| 2040 | 0.49552 | 0.53011 | 0.68051 | 0.66659 | 0.84207 | 0.806   | 0.97772 | 0.96002 |
| 2060 | 0.49373 | 0.52864 | 0.67878 | 0.665   | 0.84103 | 0.80484 | 0.97757 | 0.95976 |
| 2080 | 0.49187 | 0.52707 | 0.67701 | 0.66338 | 0.84    | 0.80368 | 0.97742 | 0.95949 |
| 2100 | 0.49009 | 0.52554 | 0.67528 | 0.66177 | 0.83895 | 0.80258 | 0.97726 | 0.95923 |
| 2120 | 0.48807 | 0.52399 | 0.67353 | 0.66019 | 0.83791 | 0.80142 | 0.9771  | 0.95895 |
| 2140 | 0.48623 | 0.52262 | 0.67185 | 0.65861 | 0.83684 | 0.80031 | 0.97696 | 0.95867 |
| 2160 | 0.48396 | 0.52088 | 0.67013 | 0.65705 | 0.83578 | 0.79925 | 0.97681 | 0.95839 |
| 2180 | 0.48181 | 0.51888 | 0.66837 | 0.65543 | 0.83472 | 0.79821 | 0.97667 | 0.95812 |
| 2200 | 0.47983 | 0.51771 | 0.66663 | 0.65385 | 0.83363 | 0.79715 | 0.97652 | 0.95787 |
| 2220 | 0.47781 | 0.51605 | 0.66491 | 0.6523  | 0.83259 | 0.79612 | 0.97639 | 0.95758 |
| 2240 | 0.47595 | 0.51471 | 0.66319 | 0.65068 | 0.83154 | 0.79506 | 0.97624 | 0.95731 |
| 2260 | 0.47397 | 0.51315 | 0.66142 | 0.64901 | 0.83052 | 0.79407 | 0.97609 | 0.95704 |
| 2280 | 0.47223 | 0.51165 | 0.65967 | 0.64734 | 0.82948 | 0.79302 | 0.97594 | 0.95676 |
| 2300 | 0.47073 | 0.51049 | 0.65794 | 0.64579 | 0.82845 | 0.792   | 0.97578 | 0.95649 |
| 2320 | 0.46925 | 0.50941 | 0.65624 | 0.64433 | 0.82742 | 0.79088 | 0.97563 | 0.95621 |
| 2340 | 0.46747 | 0.50785 | 0.65451 | 0.64287 | 0.82639 | 0.78984 | 0.97547 | 0.95593 |
| 2360 | 0.46582 | 0.50582 | 0.65282 | 0.64141 | 0.82537 | 0.78886 | 0.97532 | 0.95565 |
| 2380 | 0.46422 | 0.50439 | 0.65115 | 0.63989 | 0.82435 | 0.78787 | 0.97518 | 0.95538 |
| 2400 | 0.46256 | 0.50267 | 0.64947 | 0.63833 | 0.82332 | 0.7869  | 0.97503 | 0.95509 |
| 2420 | 0.46128 | 0.50138 | 0.64776 | 0.63689 | 0.82232 | 0.78591 | 0.9749  | 0.95478 |
| 2440 | 0.45988 | 0.50004 | 0.64618 | 0.63541 | 0.82131 | 0.78497 | 0.97477 | 0.95448 |
| 2460 | 0.45845 | 0.49875 | 0.64454 | 0.63399 | 0.82029 | 0.78403 | 0.97464 | 0.95418 |

|      |         |         |         |         |         |         |         |         |
|------|---------|---------|---------|---------|---------|---------|---------|---------|
| 2480 | 0.45687 | 0.49713 | 0.64297 | 0.63255 | 0.81929 | 0.78313 | 0.97451 | 0.95389 |
| 2500 | 0.45525 | 0.49608 | 0.64138 | 0.63119 | 0.81828 | 0.78222 | 0.97438 | 0.95359 |
| 2520 | 0.45375 | 0.4944  | 0.63979 | 0.62985 | 0.81728 | 0.78131 | 0.97424 | 0.95332 |
| 2540 | 0.45221 | 0.49343 | 0.63817 | 0.62849 | 0.81628 | 0.78048 | 0.9741  | 0.95305 |
| 2560 | 0.45084 | 0.49166 | 0.63659 | 0.62709 | 0.81529 | 0.77963 | 0.97397 | 0.95278 |
| 2580 | 0.44928 | 0.49022 | 0.63506 | 0.62566 | 0.8143  | 0.7788  | 0.97383 | 0.9525  |
| 2600 | 0.44805 | 0.48893 | 0.63358 | 0.62422 | 0.81329 | 0.77803 | 0.97369 | 0.95222 |
| 2620 | 0.44668 | 0.48779 | 0.63204 | 0.62278 | 0.8123  | 0.77719 | 0.97354 | 0.95195 |
| 2640 | 0.4453  | 0.48649 | 0.63052 | 0.62146 | 0.81129 | 0.77625 | 0.9734  | 0.95169 |
| 2660 | 0.44395 | 0.48495 | 0.62894 | 0.61999 | 0.81029 | 0.77532 | 0.97326 | 0.95145 |
| 2680 | 0.44236 | 0.4835  | 0.62738 | 0.6185  | 0.80928 | 0.77445 | 0.97313 | 0.95119 |
| 2700 | 0.44077 | 0.48213 | 0.62578 | 0.61702 | 0.80828 | 0.77363 | 0.97299 | 0.95096 |
| 2720 | 0.43914 | 0.48051 | 0.62425 | 0.61555 | 0.8073  | 0.77277 | 0.97286 | 0.95073 |
| 2740 | 0.43763 | 0.47935 | 0.62283 | 0.61403 | 0.80632 | 0.77182 | 0.97273 | 0.95048 |
| 2760 | 0.43601 | 0.47735 | 0.62133 | 0.61257 | 0.80534 | 0.77093 | 0.97258 | 0.95022 |
| 2780 | 0.43437 | 0.47611 | 0.61977 | 0.61122 | 0.80439 | 0.77003 | 0.97245 | 0.94998 |
| 2800 | 0.43278 | 0.47415 | 0.61819 | 0.60985 | 0.80342 | 0.76913 | 0.97231 | 0.94975 |
| 2820 | 0.43126 | 0.47275 | 0.6167  | 0.60856 | 0.80244 | 0.76824 | 0.97217 | 0.94952 |
| 2840 | 0.42977 | 0.47144 | 0.61522 | 0.60723 | 0.80145 | 0.76744 | 0.97203 | 0.94931 |
| 2860 | 0.42833 | 0.46985 | 0.61372 | 0.60597 | 0.80048 | 0.76664 | 0.97189 | 0.94908 |
| 2880 | 0.42684 | 0.46821 | 0.61227 | 0.60466 | 0.79951 | 0.76588 | 0.97175 | 0.94884 |
| 2900 | 0.42538 | 0.46688 | 0.61083 | 0.60332 | 0.79858 | 0.76505 | 0.97162 | 0.94859 |
| 2920 | 0.42358 | 0.46574 | 0.60932 | 0.60201 | 0.79765 | 0.76421 | 0.97148 | 0.94835 |
| 2940 | 0.42207 | 0.46432 | 0.60787 | 0.60063 | 0.79673 | 0.76338 | 0.97134 | 0.94811 |
| 2960 | 0.42084 | 0.46265 | 0.6064  | 0.59935 | 0.79581 | 0.76258 | 0.9712  | 0.94788 |
| 2980 | 0.41941 | 0.46143 | 0.6049  | 0.59806 | 0.79489 | 0.76181 | 0.97106 | 0.94764 |
| 3000 | 0.41817 | 0.46031 | 0.60339 | 0.59691 | 0.79397 | 0.76107 | 0.97092 | 0.9474  |
| 3020 | 0.41689 | 0.45918 | 0.60198 | 0.59576 | 0.79307 | 0.76028 | 0.97078 | 0.94716 |
| 3040 | 0.41555 | 0.45829 | 0.60061 | 0.59457 | 0.79216 | 0.75948 | 0.97065 | 0.94693 |
| 3060 | 0.41449 | 0.45693 | 0.5992  | 0.59333 | 0.79126 | 0.75866 | 0.97051 | 0.9467  |
| 3080 | 0.41333 | 0.4558  | 0.59787 | 0.59203 | 0.79038 | 0.75787 | 0.97037 | 0.94647 |
| 3100 | 0.41186 | 0.45434 | 0.59653 | 0.59071 | 0.78948 | 0.75696 | 0.97023 | 0.94623 |
| 3120 | 0.41073 | 0.4529  | 0.59508 | 0.58941 | 0.78856 | 0.75604 | 0.97008 | 0.94599 |
| 3140 | 0.40947 | 0.45191 | 0.59365 | 0.58814 | 0.78764 | 0.75519 | 0.96995 | 0.94578 |
| 3160 | 0.40825 | 0.45072 | 0.59217 | 0.58687 | 0.78672 | 0.75428 | 0.96981 | 0.94556 |
| 3180 | 0.40705 | 0.44885 | 0.59076 | 0.58564 | 0.78578 | 0.75343 | 0.96967 | 0.94534 |
| 3200 | 0.40586 | 0.44711 | 0.58945 | 0.58434 | 0.78486 | 0.75253 | 0.96953 | 0.94511 |
| 3220 | 0.405   | 0.44547 | 0.58801 | 0.58311 | 0.78396 | 0.75167 | 0.9694  | 0.94489 |
| 3240 | 0.40376 | 0.44398 | 0.58671 | 0.5819  | 0.78307 | 0.75073 | 0.96926 | 0.94466 |
| 3260 | 0.40253 | 0.44284 | 0.58541 | 0.58073 | 0.78213 | 0.74978 | 0.96912 | 0.94442 |
| 3280 | 0.40137 | 0.44148 | 0.58412 | 0.57962 | 0.78124 | 0.74881 | 0.96898 | 0.94418 |
| 3300 | 0.4001  | 0.4401  | 0.58278 | 0.57848 | 0.78033 | 0.7478  | 0.96884 | 0.94394 |
| 3320 | 0.39909 | 0.43881 | 0.58139 | 0.5773  | 0.77945 | 0.74676 | 0.96869 | 0.94373 |

|      |         |         |         |         |         |         |         |         |
|------|---------|---------|---------|---------|---------|---------|---------|---------|
| 3340 | 0.39754 | 0.43775 | 0.58005 | 0.57606 | 0.77855 | 0.74576 | 0.96855 | 0.9435  |
| 3360 | 0.39646 | 0.43666 | 0.57868 | 0.57492 | 0.77764 | 0.74481 | 0.9684  | 0.94329 |
| 3380 | 0.39543 | 0.43611 | 0.57737 | 0.57379 | 0.77673 | 0.74401 | 0.96826 | 0.94309 |
| 3400 | 0.39447 | 0.43597 | 0.57598 | 0.57275 | 0.77579 | 0.74322 | 0.96811 | 0.94286 |
| 3420 | 0.3933  | 0.43535 | 0.57466 | 0.57164 | 0.77488 | 0.7424  | 0.96797 | 0.94263 |
| 3440 | 0.392   | 0.43483 | 0.57333 | 0.57054 | 0.77398 | 0.74156 | 0.96782 | 0.94239 |
| 3460 | 0.39058 | 0.43396 | 0.57203 | 0.56947 | 0.77307 | 0.74075 | 0.96767 | 0.9422  |
| 3480 | 0.38956 | 0.4326  | 0.57078 | 0.56834 | 0.77216 | 0.73993 | 0.96752 | 0.94198 |
| 3500 | 0.38805 | 0.4319  | 0.56947 | 0.56731 | 0.77127 | 0.73897 | 0.96737 | 0.94176 |
| 3520 | 0.38716 | 0.43074 | 0.56817 | 0.56631 | 0.77038 | 0.73808 | 0.96722 | 0.94151 |
| 3540 | 0.38601 | 0.42973 | 0.56688 | 0.56524 | 0.76947 | 0.73714 | 0.96707 | 0.94126 |
| 3560 | 0.38483 | 0.4289  | 0.5655  | 0.56416 | 0.76857 | 0.73627 | 0.96692 | 0.941   |
| 3580 | 0.38368 | 0.42811 | 0.5642  | 0.5631  | 0.76765 | 0.73534 | 0.96677 | 0.94074 |
| 3600 | 0.38244 | 0.42741 | 0.56291 | 0.56208 | 0.76672 | 0.7344  | 0.96663 | 0.94046 |
| 3620 | 0.38114 | 0.42671 | 0.56162 | 0.56102 | 0.76583 | 0.73346 | 0.96648 | 0.9402  |
| 3640 | 0.38003 | 0.4255  | 0.56032 | 0.5599  | 0.76494 | 0.73253 | 0.96633 | 0.93996 |
| 3660 | 0.37913 | 0.42447 | 0.55906 | 0.55871 | 0.76406 | 0.73165 | 0.96619 | 0.93972 |
| 3680 | 0.3782  | 0.42372 | 0.55782 | 0.55761 | 0.7632  | 0.73091 | 0.96605 | 0.93943 |
| 3700 | 0.37722 | 0.42305 | 0.55663 | 0.55647 | 0.76234 | 0.73014 | 0.9659  | 0.93917 |
| 3720 | 0.37639 | 0.42169 | 0.55542 | 0.55534 | 0.76149 | 0.7293  | 0.96576 | 0.93885 |
| 3740 | 0.37542 | 0.42071 | 0.55427 | 0.55428 | 0.76063 | 0.72854 | 0.96561 | 0.93857 |
| 3760 | 0.37464 | 0.4199  | 0.5531  | 0.55332 | 0.75976 | 0.72795 | 0.96547 | 0.9383  |
| 3780 | 0.37368 | 0.41949 | 0.55198 | 0.5523  | 0.75893 | 0.72724 | 0.96532 | 0.93806 |
| 3800 | 0.37268 | 0.41852 | 0.5509  | 0.55128 | 0.75807 | 0.72648 | 0.96517 | 0.93779 |
| 3820 | 0.37157 | 0.41857 | 0.54985 | 0.55032 | 0.75723 | 0.72564 | 0.96503 | 0.93754 |
| 3840 | 0.37041 | 0.41757 | 0.54879 | 0.54931 | 0.75637 | 0.72481 | 0.9649  | 0.93725 |
| 3860 | 0.36955 | 0.41649 | 0.54772 | 0.54838 | 0.75552 | 0.72383 | 0.96476 | 0.93698 |
| 3880 | 0.36824 | 0.4156  | 0.54668 | 0.54739 | 0.75468 | 0.72292 | 0.96463 | 0.93669 |
| 3900 | 0.36724 | 0.41508 | 0.54565 | 0.54638 | 0.75385 | 0.72192 | 0.9645  | 0.9364  |
| 3920 | 0.36647 | 0.41439 | 0.54456 | 0.54535 | 0.75303 | 0.72098 | 0.96437 | 0.93609 |
| 3940 | 0.36551 | 0.41464 | 0.54345 | 0.54434 | 0.75219 | 0.7201  | 0.96423 | 0.93578 |
| 3960 | 0.36454 | 0.41451 | 0.54236 | 0.54339 | 0.75136 | 0.7192  | 0.96408 | 0.93545 |
| 3980 | 0.36361 | 0.41418 | 0.54135 | 0.54237 | 0.75055 | 0.71822 | 0.96394 | 0.93509 |
| 4000 | 0.36265 | 0.4144  | 0.54038 | 0.5414  | 0.74973 | 0.71714 | 0.9638  | 0.93478 |
| 4020 | 0.36187 | 0.41311 | 0.53938 | 0.5404  | 0.7489  | 0.71613 | 0.96365 | 0.93452 |
| 4040 | 0.36122 | 0.412   | 0.53837 | 0.53941 | 0.74808 | 0.71524 | 0.96351 | 0.93429 |
| 4060 | 0.36025 | 0.41106 | 0.53738 | 0.53836 | 0.74728 | 0.71442 | 0.96337 | 0.93406 |
| 4080 | 0.35924 | 0.41001 | 0.53644 | 0.53736 | 0.74648 | 0.71368 | 0.96322 | 0.93383 |
| 4100 | 0.35852 | 0.4085  | 0.53544 | 0.53625 | 0.7457  | 0.71299 | 0.96308 | 0.93358 |
| 4120 | 0.35788 | 0.40707 | 0.5345  | 0.53519 | 0.74493 | 0.71231 | 0.96293 | 0.93335 |
| 4140 | 0.35725 | 0.40597 | 0.53355 | 0.53409 | 0.74418 | 0.71171 | 0.96279 | 0.93314 |
| 4160 | 0.35633 | 0.40476 | 0.5326  | 0.53301 | 0.74343 | 0.71119 | 0.96264 | 0.93292 |
| 4180 | 0.35577 | 0.40312 | 0.53176 | 0.53197 | 0.74267 | 0.71062 | 0.96249 | 0.93271 |



|      |         |         |         |         |         |         |         |         |
|------|---------|---------|---------|---------|---------|---------|---------|---------|
| 4200 | 0.35488 | 0.40178 | 0.53078 | 0.53094 | 0.74191 | 0.70985 | 0.96233 | 0.93252 |
| 4220 | 0.35449 | 0.40053 | 0.52974 | 0.52995 | 0.74113 | 0.70904 | 0.96218 | 0.93235 |
| 4240 | 0.35403 | 0.39874 | 0.52885 | 0.52901 | 0.74035 | 0.70817 | 0.96202 | 0.93217 |
| 4260 | 0.35342 | 0.3976  | 0.52792 | 0.52815 | 0.73956 | 0.70739 | 0.96188 | 0.93198 |
| 4280 | 0.35285 | 0.39659 | 0.52702 | 0.52725 | 0.73875 | 0.70658 | 0.96173 | 0.93172 |
| 4300 | 0.35213 | 0.3962  | 0.52615 | 0.52634 | 0.73798 | 0.70601 | 0.96158 | 0.93151 |
| 4320 | 0.35135 | 0.39572 | 0.52525 | 0.52543 | 0.73724 | 0.70544 | 0.96143 | 0.93126 |
| 4340 | 0.35044 | 0.39532 | 0.52439 | 0.52448 | 0.7365  | 0.7047  | 0.96128 | 0.93102 |
| 4360 | 0.34937 | 0.39471 | 0.52347 | 0.52351 | 0.73575 | 0.70385 | 0.96114 | 0.93081 |
| 4380 | 0.34844 | 0.39372 | 0.52263 | 0.52248 | 0.735   | 0.70319 | 0.96099 | 0.93058 |
| 4400 | 0.34757 | 0.39297 | 0.52174 | 0.52131 | 0.73424 | 0.70231 | 0.96085 | 0.93034 |
| 4420 | 0.3468  | 0.39227 | 0.52075 | 0.52028 | 0.7335  | 0.70129 | 0.96071 | 0.93011 |
| 4440 | 0.34627 | 0.39109 | 0.5199  | 0.51936 | 0.73275 | 0.70044 | 0.96057 | 0.92992 |
| 4460 | 0.34542 | 0.39039 | 0.5191  | 0.51841 | 0.73201 | 0.69957 | 0.96042 | 0.92966 |
| 4480 | 0.34477 | 0.3896  | 0.51823 | 0.51737 | 0.73129 | 0.69876 | 0.96028 | 0.92939 |
| 4500 | 0.34408 | 0.38874 | 0.51727 | 0.51631 | 0.73054 | 0.69816 | 0.96014 | 0.92915 |
| 4520 | 0.34336 | 0.3884  | 0.51626 | 0.51524 | 0.72981 | 0.69724 | 0.96    | 0.92897 |
| 4540 | 0.34282 | 0.38687 | 0.51524 | 0.51422 | 0.72909 | 0.69599 | 0.95987 | 0.92878 |
| 4560 | 0.34208 | 0.38637 | 0.51425 | 0.51332 | 0.72836 | 0.69479 | 0.95974 | 0.92853 |
| 4580 | 0.34126 | 0.38537 | 0.51329 | 0.51236 | 0.72761 | 0.69369 | 0.95961 | 0.92825 |
| 4600 | 0.34056 | 0.38336 | 0.51239 | 0.51136 | 0.72685 | 0.6927  | 0.95947 | 0.92789 |
| 4620 | 0.33979 | 0.38188 | 0.51141 | 0.51048 | 0.72611 | 0.69162 | 0.95933 | 0.92743 |
| 4640 | 0.33916 | 0.38126 | 0.51053 | 0.50961 | 0.72536 | 0.69073 | 0.95919 | 0.92711 |
| 4660 | 0.33837 | 0.38031 | 0.50967 | 0.50862 | 0.72459 | 0.68999 | 0.95905 | 0.92682 |
| 4680 | 0.33784 | 0.37881 | 0.50871 | 0.5077  | 0.72384 | 0.68938 | 0.95891 | 0.9265  |
| 4700 | 0.33697 | 0.37811 | 0.50778 | 0.50685 | 0.72309 | 0.68868 | 0.95877 | 0.92613 |
| 4720 | 0.33622 | 0.37805 | 0.50684 | 0.50584 | 0.72235 | 0.68813 | 0.95863 | 0.92572 |
| 4740 | 0.33602 | 0.37738 | 0.50597 | 0.50485 | 0.72161 | 0.68782 | 0.95848 | 0.92533 |
| 4760 | 0.33516 | 0.37706 | 0.50502 | 0.50387 | 0.72085 | 0.68756 | 0.95832 | 0.92496 |
| 4780 | 0.33483 | 0.37639 | 0.50416 | 0.50295 | 0.72009 | 0.68726 | 0.95819 | 0.92473 |
| 4800 | 0.33428 | 0.37494 | 0.50345 | 0.50201 | 0.71939 | 0.68679 | 0.95805 | 0.92446 |
| 4820 | 0.33386 | 0.37526 | 0.50275 | 0.50115 | 0.71866 | 0.6867  | 0.95791 | 0.92414 |
| 4840 | 0.33328 | 0.37484 | 0.50196 | 0.50027 | 0.71796 | 0.68633 | 0.95778 | 0.92387 |
| 4860 | 0.33313 | 0.37523 | 0.50118 | 0.49934 | 0.71724 | 0.68528 | 0.95764 | 0.92367 |
| 4880 | 0.33266 | 0.37451 | 0.50039 | 0.49853 | 0.71652 | 0.68377 | 0.95751 | 0.92343 |
| 4900 | 0.33237 | 0.3772  | 0.49965 | 0.49769 | 0.71582 | 0.68214 | 0.95737 | 0.9231  |
| 4920 | 0.33167 | 0.37829 | 0.49887 | 0.4969  | 0.71508 | 0.68079 | 0.95723 | 0.92286 |
| 4940 | 0.33074 | 0.37842 | 0.49804 | 0.496   | 0.71436 | 0.6805  | 0.95708 | 0.92252 |
| 4960 | 0.33001 | 0.3774  | 0.49707 | 0.49524 | 0.71366 | 0.67925 | 0.95695 | 0.92194 |
| 4980 | 0.32891 | 0.38085 | 0.4963  | 0.49431 | 0.71297 | 0.67732 | 0.95682 | 0.92136 |
| 5000 | 0.32797 | 0.38145 | 0.49548 | 0.49342 | 0.71229 | 0.67616 | 0.95668 | 0.92078 |

## 7. Figure 6

| Probability distribution of adsorbed monomers in each adsorbed chain $P(M_{\text{ads}})$ |            |            |
|------------------------------------------------------------------------------------------|------------|------------|
| $M_{\text{ads}}$                                                                         | ring       | linear     |
| 1                                                                                        | 0.01623    | 0.03341    |
| 2                                                                                        | 0.04469    | 0.05915    |
| 3                                                                                        | 0.05198    | 0.06471    |
| 4                                                                                        | 0.05394    | 0.06655    |
| 5                                                                                        | 0.05579    | 0.06742    |
| 6                                                                                        | 0.05762    | 0.06725    |
| 7                                                                                        | 0.05795    | 0.06616    |
| 8                                                                                        | 0.05919    | 0.06402    |
| 9                                                                                        | 0.05935    | 0.06179    |
| 10                                                                                       | 0.05943    | 0.0587     |
| 11                                                                                       | 0.05844    | 0.05511    |
| 12                                                                                       | 0.05713    | 0.05127    |
| 13                                                                                       | 0.05564    | 0.04668    |
| 14                                                                                       | 0.05088    | 0.04205    |
| 15                                                                                       | 0.04752    | 0.0376     |
| 16                                                                                       | 0.04281    | 0.0329     |
| 17                                                                                       | 0.03805    | 0.02802    |
| 18                                                                                       | 0.03231    | 0.0237     |
| 19                                                                                       | 0.02695    | 0.01952    |
| 20                                                                                       | 0.02149    | 0.01573    |
| 21                                                                                       | 0.01638    | 0.01219    |
| 22                                                                                       | 0.01269    | 0.00884    |
| 23                                                                                       | 0.0089     | 0.00642    |
| 24                                                                                       | 0.00595    | 0.00448    |
| 25                                                                                       | 0.00389    | 0.00273    |
| 26                                                                                       | 0.00244    | 0.00176    |
| 27                                                                                       | 0.00127    | 9.53333E-4 |
| 28                                                                                       | 6.48074E-4 | 4.9881E-4  |
| 29                                                                                       | 2.55302E-4 | 2.54067E-4 |
| 30                                                                                       | 1.3747E-4  | 8.62425E-5 |
| 31                                                                                       | 4.58237E-5 | 3.03014E-5 |
| 32                                                                                       | 6.54681E-6 | 4.66176E-6 |

## 8. Figure 7(a)

| Layer-resolved $\langle \delta r^2 \rangle$ for non-adsorbed chains at $\varepsilon_{\text{ps}} = 5$ |                              |        |                              |
|------------------------------------------------------------------------------------------------------|------------------------------|--------|------------------------------|
| ring                                                                                                 |                              | linear |                              |
| $z_c$                                                                                                | $\langle \delta r^2 \rangle$ | $z_c$  | $\langle \delta r^2 \rangle$ |
| 3                                                                                                    |                              | 3      | 0.05029                      |
| 4                                                                                                    | 0.0556                       | 4      | 0.05223                      |
| 5                                                                                                    | 0.05918                      | 5      | 0.05517                      |

|    |         |    |         |
|----|---------|----|---------|
| 6  | 0.06279 | 6  | 0.05737 |
| 7  | 0.06526 | 7  | 0.05934 |
| 8  | 0.06717 | 8  | 0.06071 |
| 9  | 0.06805 | 9  | 0.06161 |
| 10 | 0.06865 | 10 | 0.06221 |
| 11 | 0.06893 | 11 | 0.06264 |
| 12 | 0.06974 | 12 | 0.06276 |
| 13 | 0.06982 | 13 | 0.06305 |
| 14 | 0.07015 | 14 | 0.06341 |
| 15 | 0.07032 | 15 | 0.06339 |
| 16 | 0.07041 | 16 | 0.06352 |
| 17 | 0.07065 | 17 | 0.06357 |
| 18 | 0.07002 | 18 | 0.06338 |
| 19 | 0.07065 | 19 | 0.0638  |
| 20 | 0.07059 | 20 | 0.06398 |
| 21 | 0.07052 | 21 | 0.06328 |
| 22 | 0.07036 | 22 | 0.06377 |
| 23 | 0.07043 | 23 | 0.06372 |
| 24 | 0.07048 | 24 | 0.0637  |
| 25 | 0.07066 | 25 | 0.06369 |
| 26 | 0.07043 | 26 | 0.06348 |
| 27 | 0.07051 | 27 | 0.06334 |
| 28 | 0.07055 | 28 | 0.06376 |
| 29 | 0.0705  | 29 | 0.06365 |
| 30 | 0.07049 | 30 | 0.06356 |
| 31 | 0.07034 | 31 | 0.06393 |

### 9. Figure 7(b)

| $z_c$ | $\langle \delta r^2 \rangle / \langle \delta r^2 \rangle_{\text{bulk}}$ at $\epsilon_{\text{ps}} = 3$ |         | $\langle \delta r^2 \rangle / \langle \delta r^2 \rangle_{\text{bulk}}$ at $\epsilon_{\text{ps}} = 5$ |         | $\langle \delta r^2 \rangle / \langle \delta r^2 \rangle_{\text{bulk}}$ at $\epsilon_{\text{ps}} = 10$ |         |
|-------|-------------------------------------------------------------------------------------------------------|---------|-------------------------------------------------------------------------------------------------------|---------|--------------------------------------------------------------------------------------------------------|---------|
|       | ring                                                                                                  | linear  | ring                                                                                                  | linear  | ring                                                                                                   | linear  |
| 3     | 0.89288                                                                                               | 0.90901 |                                                                                                       | 0.79092 | 0.46587                                                                                                | 0.51834 |
| 4     | 0.8813                                                                                                | 0.90648 | 0.78896                                                                                               | 0.8214  | 0.57987                                                                                                | 0.62592 |
| 5     | 0.90209                                                                                               | 0.92143 | 0.83981                                                                                               | 0.86763 | 0.70186                                                                                                | 0.73315 |
| 6     | 0.94058                                                                                               | 0.94317 | 0.891                                                                                                 | 0.90222 | 0.80688                                                                                                | 0.82432 |
| 7     | 0.95174                                                                                               | 0.95426 | 0.92604                                                                                               | 0.9332  | 0.87536                                                                                                | 0.87404 |
| 8     | 0.96983                                                                                               | 0.96987 | 0.95314                                                                                               | 0.95473 | 0.91146                                                                                                | 0.91614 |
| 9     | 0.97739                                                                                               | 0.97082 | 0.9657                                                                                                | 0.96894 | 0.94105                                                                                                | 0.93973 |
| 10    | 0.98413                                                                                               | 0.98118 | 0.9742                                                                                                | 0.97822 | 0.95579                                                                                                | 0.95459 |
| 11    | 0.98976                                                                                               | 0.98472 | 0.97812                                                                                               | 0.98513 | 0.97383                                                                                                | 0.96781 |
| 12    | 0.99005                                                                                               | 0.98823 | 0.98957                                                                                               | 0.98692 | 0.97502                                                                                                | 0.97606 |
| 13    | 0.99164                                                                                               | 0.98538 | 0.99077                                                                                               | 0.99156 | 0.98292                                                                                                | 0.98337 |
| 14    | 0.9901                                                                                                | 0.99678 | 0.99543                                                                                               | 0.99713 | 0.98789                                                                                                | 0.9925  |
| 15    | 0.99027                                                                                               | 0.99319 | 0.99788                                                                                               | 0.99681 | 0.98645                                                                                                | 0.98902 |

|    |         |         |         |         |         |         |
|----|---------|---------|---------|---------|---------|---------|
| 16 | 0.99335 | 0.99976 | 0.99913 | 0.99887 | 0.98888 | 0.99134 |
| 17 | 0.99275 | 0.99434 | 1.00253 | 0.99972 | 0.99421 | 1.00289 |
| 18 | 0.99725 | 1.00027 | 0.99363 | 0.99667 | 0.99307 | 1.00063 |
| 19 | 0.99819 | 0.99907 | 1.00257 | 1.00326 | 0.99919 | 1.00525 |
| 20 | 0.99492 | 0.99537 | 1.00163 | 1.00608 | 0.99489 | 1.00457 |
| 21 | 0.99718 | 0.99999 | 1.00077 | 0.99514 | 0.99878 | 1.00307 |
| 22 | 0.99777 | 0.99772 | 0.99837 | 1.0029  | 0.99939 | 1.00003 |
| 23 | 0.99497 | 1.0036  | 0.99944 | 1.00211 | 0.99594 | 0.99503 |
| 24 | 0.99464 | 0.99781 | 1.00009 | 1.00175 | 1.00036 | 1.00065 |
| 25 | 0.99845 | 0.99764 | 1.00267 | 1.00154 | 0.9951  | 0.99976 |
| 26 | 1.00119 | 1.00213 | 0.99944 | 0.99833 | 1.00084 | 0.99785 |
| 27 | 0.99989 | 1.00379 | 1.0005  | 0.99606 | 0.99848 | 1.00197 |
| 28 | 0.9953  | 0.99987 | 1.00114 | 1.00262 | 0.99866 | 0.99977 |
| 29 | 0.99976 | 0.99841 | 1.00044 | 1.00101 | 1.00084 | 1.00228 |
| 30 | 0.99988 | 1.00035 | 1.00023 | 0.9995  | 0.99736 | 0.9977  |
| 31 | 1.00509 | 0.9984  | 0.9982  | 1.00534 | 0.99784 | 0.99549 |

### 10. Figure 8(a)

| Monomer densities of loops and non-adsorbed chains in the ring polymer film |                      |      |                              |
|-----------------------------------------------------------------------------|----------------------|------|------------------------------|
| $z$                                                                         | $\rho_{\text{loop}}$ | $z$  | $\rho_{\text{non-adsorbed}}$ |
| 1.35                                                                        | 0.18135              | 1.35 | 0.00132                      |
| 1.45                                                                        | 0.2766               | 1.45 | 0.00275                      |
| 1.55                                                                        | 0.57505              | 1.55 | 0.00811                      |
| 1.65                                                                        | 1.17233              | 1.65 | 0.02969                      |
| 1.75                                                                        | 1.51678              | 1.75 | 0.08157                      |
| 1.85                                                                        | 1.1903               | 1.85 | 0.121                        |
| 1.95                                                                        | 0.80799              | 1.95 | 0.11768                      |
| 2.05                                                                        | 0.57462              | 2.05 | 0.09779                      |
| 2.15                                                                        | 0.46338              | 2.15 | 0.08381                      |
| 2.25                                                                        | 0.43548              | 2.25 | 0.08335                      |
| 2.35                                                                        | 0.47268              | 2.35 | 0.09611                      |
| 2.45                                                                        | 0.56569              | 2.45 | 0.12535                      |
| 2.55                                                                        | 0.67307              | 2.55 | 0.17377                      |
| 2.65                                                                        | 0.72585              | 2.65 | 0.23036                      |
| 2.75                                                                        | 0.67562              | 2.75 | 0.26541                      |
| 2.85                                                                        | 0.57948              | 2.85 | 0.27218                      |
| 2.95                                                                        | 0.49227              | 2.95 | 0.2638                       |
| 3.05                                                                        | 0.43695              | 3.05 | 0.26153                      |
| 3.15                                                                        | 0.41197              | 3.15 | 0.26909                      |
| 3.25                                                                        | 0.40463              | 3.25 | 0.28749                      |
| 3.35                                                                        | 0.40931              | 3.35 | 0.32177                      |
| 3.45                                                                        | 0.41569              | 3.45 | 0.36381                      |
| 3.55                                                                        | 0.40701              | 3.55 | 0.40361                      |

|      |         |      |         |
|------|---------|------|---------|
| 3.65 | 0.37788 | 3.65 | 0.43433 |
| 3.75 | 0.34512 | 3.75 | 0.44963 |
| 3.85 | 0.31067 | 3.85 | 0.45367 |
| 3.95 | 0.28264 | 3.95 | 0.4623  |
| 4.05 | 0.26142 | 4.05 | 0.47537 |
| 4.15 | 0.24586 | 4.15 | 0.49137 |
| 4.25 | 0.23181 | 4.25 | 0.51886 |
| 4.35 | 0.21741 | 4.35 | 0.54477 |
| 4.45 | 0.20341 | 4.45 | 0.57041 |
| 4.55 | 0.1862  | 4.55 | 0.59005 |
| 4.65 | 0.16692 | 4.65 | 0.60542 |
| 4.75 | 0.15005 | 4.75 | 0.61479 |
| 4.85 | 0.13484 | 4.85 | 0.62174 |
| 4.95 | 0.12173 | 4.95 | 0.63257 |
| 5.05 | 0.11036 | 5.05 | 0.64202 |
| 5.15 | 0.10007 | 5.15 | 0.65698 |
| 5.25 | 0.09018 | 5.25 | 0.67023 |
| 5.35 | 0.08053 | 5.35 | 0.6826  |
| 5.45 | 0.07158 | 5.45 | 0.69354 |
| 5.55 | 0.06334 | 5.55 | 0.70051 |
| 5.65 | 0.05554 | 5.65 | 0.71055 |
| 5.75 | 0.04827 | 5.75 | 0.71494 |
| 5.85 | 0.04145 | 5.85 | 0.71368 |
| 5.95 | 0.03688 | 5.95 | 0.72073 |
| 6.05 | 0.03169 | 6.05 | 0.72743 |
| 6.15 | 0.0278  | 6.15 | 0.73325 |
| 6.25 | 0.02398 | 6.25 | 0.73617 |
| 6.35 | 0.02019 | 6.35 | 0.74325 |
| 6.45 | 0.01743 | 6.45 | 0.7458  |
| 6.55 | 0.01479 | 6.55 | 0.74904 |
| 6.65 | 0.01241 | 6.65 | 0.74794 |
| 6.75 | 0.01049 | 6.75 | 0.7506  |
| 6.85 | 0.00865 | 6.85 | 0.74967 |
| 6.95 | 0.00719 | 6.95 | 0.75536 |
| 7.05 | 0.00616 | 7.05 | 0.75508 |
| 7.15 | 0.00508 | 7.15 | 0.75541 |
| 7.25 | 0.00412 | 7.25 | 0.75638 |
| 7.35 | 0.00335 | 7.35 | 0.75619 |
| 7.45 | 0.00264 | 7.45 | 0.75871 |
| 7.55 | 0.00216 | 7.55 | 0.75967 |
| 7.65 | 0.00183 | 7.65 | 0.75895 |
| 7.75 | 0.0014  | 7.75 | 0.75723 |
| 7.85 | 0.00113 | 7.85 | 0.75942 |

|      |          |       |         |
|------|----------|-------|---------|
| 7.95 | 8.738E-4 | 7.95  | 0.76202 |
| 8.05 | 7.674E-4 | 8.05  | 0.75942 |
| 8.15 | 5.167E-4 | 8.15  | 0.76029 |
| 8.25 | 4.569E-4 | 8.25  | 0.76109 |
| 8.35 | 3.238E-4 | 8.35  | 0.76036 |
| 8.45 | 2.75E-4  | 8.45  | 0.76178 |
| 8.55 | 1.575E-4 | 8.55  | 0.76141 |
|      |          | 8.65  | 0.76009 |
|      |          | 8.75  | 0.76106 |
|      |          | 8.85  | 0.76189 |
|      |          | 8.95  | 0.75903 |
|      |          | 9.05  | 0.76162 |
|      |          | 9.15  | 0.76223 |
|      |          | 9.25  | 0.7597  |
|      |          | 9.35  | 0.76277 |
|      |          | 9.45  | 0.76112 |
|      |          | 9.55  | 0.76176 |
|      |          | 9.65  | 0.76094 |
|      |          | 9.75  | 0.7625  |
|      |          | 9.85  | 0.75921 |
|      |          | 9.95  | 0.75969 |
|      |          | 10.05 | 0.76239 |
|      |          | 10.15 | 0.76282 |
|      |          | 10.25 | 0.75938 |
|      |          | 10.35 | 0.76013 |
|      |          | 10.45 | 0.76    |
|      |          | 10.55 | 0.76092 |
|      |          | 10.65 | 0.76237 |
|      |          | 10.75 | 0.7605  |
|      |          | 10.85 | 0.76177 |
|      |          | 10.95 | 0.76212 |
|      |          | 11.05 | 0.75966 |
|      |          | 11.15 | 0.76214 |
|      |          | 11.25 | 0.76056 |
|      |          | 11.35 | 0.76076 |
|      |          | 11.45 | 0.76005 |
|      |          | 11.55 | 0.75996 |
|      |          | 11.65 | 0.76305 |
|      |          | 11.75 | 0.76121 |
|      |          | 11.85 | 0.76255 |
|      |          | 11.95 | 0.76263 |
|      |          | 12.05 | 0.76078 |
|      |          | 12.15 | 0.75976 |

|  |  |       |         |
|--|--|-------|---------|
|  |  | 12.25 | 0.75973 |
|  |  | 12.35 | 0.75915 |
|  |  | 12.45 | 0.7611  |
|  |  | 12.55 | 0.76147 |
|  |  | 12.65 | 0.7619  |
|  |  | 12.75 | 0.76063 |
|  |  | 12.85 | 0.76175 |
|  |  | 12.95 | 0.76211 |
|  |  | 13.05 | 0.76026 |
|  |  | 13.15 | 0.76032 |
|  |  | 13.25 | 0.75943 |
|  |  | 13.35 | 0.7622  |
|  |  | 13.45 | 0.7589  |
|  |  | 13.55 | 0.76036 |
|  |  | 13.65 | 0.76172 |
|  |  | 13.75 | 0.76169 |
|  |  | 13.85 | 0.75953 |
|  |  | 13.95 | 0.7595  |

### 11. Figure 8(b)

| Monomer densities of loops, tails, and non-adsorbed chains in the linear polymer film |                      |      |                      |      |                              |
|---------------------------------------------------------------------------------------|----------------------|------|----------------------|------|------------------------------|
| $z$                                                                                   | $\rho_{\text{loop}}$ | $z$  | $\rho_{\text{tail}}$ | $z$  | $\rho_{\text{non-adsorbed}}$ |
| 1.35                                                                                  | 0.12755              | 1.35 | 0.05245              | 1.35 | 0.00172                      |
| 1.45                                                                                  | 0.18702              | 1.45 | 0.08625              | 1.45 | 0.00332                      |
| 1.55                                                                                  | 0.36326              | 1.55 | 0.20063              | 1.55 | 0.0095                       |
| 1.65                                                                                  | 0.64227              | 1.65 | 0.50084              | 1.65 | 0.03304                      |
| 1.75                                                                                  | 0.698                | 1.75 | 0.77675              | 1.75 | 0.08796                      |
| 1.85                                                                                  | 0.4688               | 1.85 | 0.70825              | 1.85 | 0.12956                      |
| 1.95                                                                                  | 0.28314              | 1.95 | 0.52367              | 1.95 | 0.12219                      |
| 2.05                                                                                  | 0.18989              | 2.05 | 0.38948              | 2.05 | 0.10117                      |
| 2.15                                                                                  | 0.14713              | 2.15 | 0.31987              | 2.15 | 0.08563                      |
| 2.25                                                                                  | 0.13317              | 2.25 | 0.29995              | 2.25 | 0.08436                      |
| 2.35                                                                                  | 0.13949              | 2.35 | 0.32989              | 2.35 | 0.09469                      |
| 2.45                                                                                  | 0.15606              | 2.45 | 0.39749              | 2.45 | 0.1214                       |
| 2.55                                                                                  | 0.17076              | 2.55 | 0.49046              | 2.55 | 0.16734                      |
| 2.65                                                                                  | 0.16404              | 2.65 | 0.55174              | 2.65 | 0.21684                      |
| 2.75                                                                                  | 0.13931              | 2.75 | 0.54138              | 2.75 | 0.24887                      |
| 2.85                                                                                  | 0.10868              | 2.85 | 0.48226              | 2.85 | 0.25136                      |
| 2.95                                                                                  | 0.08715              | 2.95 | 0.42383              | 2.95 | 0.24389                      |
| 3.05                                                                                  | 0.07168              | 3.05 | 0.3847               | 3.05 | 0.23923                      |
| 3.15                                                                                  | 0.06403              | 3.15 | 0.36914              | 3.15 | 0.24265                      |
| 3.25                                                                                  | 0.05917              | 3.25 | 0.36863              | 3.25 | 0.2584                       |
| 3.35                                                                                  | 0.05639              | 3.35 | 0.38043              | 3.35 | 0.28385                      |

|      |          |      |         |      |         |
|------|----------|------|---------|------|---------|
| 3.45 | 0.05306  | 3.45 | 0.39627 | 3.45 | 0.31727 |
| 3.55 | 0.04794  | 3.55 | 0.39918 | 3.55 | 0.35021 |
| 3.65 | 0.0417   | 3.65 | 0.38726 | 3.65 | 0.37423 |
| 3.75 | 0.03436  | 3.75 | 0.3645  | 3.75 | 0.38478 |
| 3.85 | 0.02922  | 3.85 | 0.34122 | 3.85 | 0.38941 |
| 3.95 | 0.02556  | 3.95 | 0.32095 | 3.95 | 0.394   |
| 4.05 | 0.02155  | 4.05 | 0.30535 | 4.05 | 0.40258 |
| 4.15 | 0.01872  | 4.15 | 0.29475 | 4.15 | 0.41617 |
| 4.25 | 0.01675  | 4.25 | 0.28853 | 4.25 | 0.43528 |
| 4.35 | 0.01484  | 4.35 | 0.27998 | 4.35 | 0.4577  |
| 4.45 | 0.01268  | 4.45 | 0.27389 | 4.45 | 0.47745 |
| 4.55 | 0.01086  | 4.55 | 0.25938 | 4.55 | 0.49552 |
| 4.65 | 0.00935  | 4.65 | 0.24625 | 4.65 | 0.50594 |
| 4.75 | 0.0077   | 4.75 | 0.23518 | 4.75 | 0.51395 |
| 4.85 | 0.00652  | 4.85 | 0.21926 | 4.85 | 0.52297 |
| 4.95 | 0.00553  | 4.95 | 0.20873 | 4.95 | 0.5326  |
| 5.05 | 0.0048   | 5.05 | 0.19746 | 5.05 | 0.5426  |
| 5.15 | 0.00402  | 5.15 | 0.18895 | 5.15 | 0.55617 |
| 5.25 | 0.00342  | 5.25 | 0.17855 | 5.25 | 0.57063 |
| 5.35 | 0.00281  | 5.35 | 0.17081 | 5.35 | 0.58185 |
| 5.45 | 0.00235  | 5.45 | 0.16179 | 5.45 | 0.59057 |
| 5.55 | 0.00197  | 5.55 | 0.15345 | 5.55 | 0.60064 |
| 5.65 | 0.00159  | 5.65 | 0.14253 | 5.65 | 0.60875 |
| 5.75 | 0.00138  | 5.75 | 0.13356 | 5.75 | 0.61892 |
| 5.85 | 0.00116  | 5.85 | 0.12705 | 5.85 | 0.62263 |
| 5.95 | 8.051E-4 | 5.95 | 0.11864 | 5.95 | 0.63043 |
| 6.05 | 7.784E-4 | 6.05 | 0.11188 | 6.05 | 0.63786 |
| 6.15 | 5.567E-4 | 6.15 | 0.10514 | 6.15 | 0.64734 |
| 6.25 | 4.524E-4 | 6.25 | 0.09904 | 6.25 | 0.65128 |
| 6.35 | 3.748E-4 | 6.35 | 0.09284 | 6.35 | 0.65812 |
| 6.45 | 3.327E-4 | 6.45 | 0.08768 | 6.45 | 0.66648 |
| 6.55 | 2.44E-4  | 6.55 | 0.08232 | 6.55 | 0.67122 |
| 6.65 | 1.663E-4 | 6.65 | 0.07699 | 6.65 | 0.677   |
| 6.75 | 1.308E-4 | 6.75 | 0.07114 | 6.75 | 0.67843 |
| 6.85 | 1.02E-4  | 6.85 | 0.06708 | 6.85 | 0.68483 |
|      |          | 6.95 | 0.06221 | 6.95 | 0.68967 |
|      |          | 7.05 | 0.05893 | 7.05 | 0.69342 |
|      |          | 7.15 | 0.0543  | 7.15 | 0.6999  |
|      |          | 7.25 | 0.05084 | 7.25 | 0.70284 |
|      |          | 7.35 | 0.04762 | 7.35 | 0.7036  |
|      |          | 7.45 | 0.04396 | 7.45 | 0.70894 |
|      |          | 7.55 | 0.04068 | 7.55 | 0.71223 |
|      |          | 7.65 | 0.03802 | 7.65 | 0.71339 |



|  |  |       |          |       |         |
|--|--|-------|----------|-------|---------|
|  |  | 7.75  | 0.03608  | 7.75  | 0.71567 |
|  |  | 7.85  | 0.03354  | 7.85  | 0.7207  |
|  |  | 7.95  | 0.03096  | 7.95  | 0.72238 |
|  |  | 8.05  | 0.02881  | 8.05  | 0.72462 |
|  |  | 8.15  | 0.02686  | 8.15  | 0.72601 |
|  |  | 8.25  | 0.02466  | 8.25  | 0.72684 |
|  |  | 8.35  | 0.02301  | 8.35  | 0.7287  |
|  |  | 8.45  | 0.02143  | 8.45  | 0.73252 |
|  |  | 8.55  | 0.01978  | 8.55  | 0.73375 |
|  |  | 8.65  | 0.01817  | 8.65  | 0.73348 |
|  |  | 8.75  | 0.0169   | 8.75  | 0.73717 |
|  |  | 8.85  | 0.01592  | 8.85  | 0.73796 |
|  |  | 8.95  | 0.01419  | 8.95  | 0.74013 |
|  |  | 9.05  | 0.01303  | 9.05  | 0.74056 |
|  |  | 9.15  | 0.01231  | 9.15  | 0.73959 |
|  |  | 9.25  | 0.01127  | 9.25  | 0.7413  |
|  |  | 9.35  | 0.01054  | 9.35  | 0.74241 |
|  |  | 9.45  | 0.00974  | 9.45  | 0.74211 |
|  |  | 9.55  | 0.00886  | 9.55  | 0.74383 |
|  |  | 9.65  | 0.00792  | 9.65  | 0.74373 |
|  |  | 9.75  | 0.00727  | 9.75  | 0.74637 |
|  |  | 9.85  | 0.00675  | 9.85  | 0.74659 |
|  |  | 9.95  | 0.00613  | 9.95  | 0.74771 |
|  |  | 10.05 | 0.00567  | 10.05 | 0.74591 |
|  |  | 10.15 | 0.00532  | 10.15 | 0.7485  |
|  |  | 10.25 | 0.00482  | 10.25 | 0.74877 |
|  |  | 10.35 | 0.00424  | 10.35 | 0.7468  |
|  |  | 10.45 | 0.00383  | 10.45 | 0.74943 |
|  |  | 10.55 | 0.00351  | 10.55 | 0.74916 |
|  |  | 10.65 | 0.00324  | 10.65 | 0.74992 |
|  |  | 10.75 | 0.00292  | 10.75 | 0.75028 |
|  |  | 10.85 | 0.00261  | 10.85 | 0.7507  |
|  |  | 10.95 | 0.0024   | 10.95 | 0.74902 |
|  |  | 11.05 | 0.00225  | 11.05 | 0.75    |
|  |  | 11.15 | 0.00198  | 11.15 | 0.74824 |
|  |  | 11.25 | 0.00178  | 11.25 | 0.75401 |
|  |  | 11.35 | 0.00157  | 11.35 | 0.75052 |
|  |  | 11.45 | 0.00141  | 11.45 | 0.75166 |
|  |  | 11.55 | 0.00126  | 11.55 | 0.75073 |
|  |  | 11.65 | 0.00122  | 11.65 | 0.75249 |
|  |  | 11.75 | 0.00118  | 11.75 | 0.74985 |
|  |  | 11.85 | 9.492E-4 | 11.85 | 0.75272 |
|  |  | 11.95 | 8.383E-4 | 11.95 | 0.7521  |

|  |  |       |          |       |         |
|--|--|-------|----------|-------|---------|
|  |  | 12.05 | 7.873E-4 | 12.05 | 0.75086 |
|  |  | 12.15 | 7.452E-4 | 12.15 | 0.75331 |
|  |  | 12.25 | 6.476E-4 | 12.25 | 0.75257 |
|  |  | 12.35 | 5.411E-4 | 12.35 | 0.75061 |
|  |  | 12.45 | 4.923E-4 | 12.45 | 0.75148 |
|  |  | 12.55 | 4.68E-4  | 12.55 | 0.75124 |
|  |  | 12.65 | 4.169E-4 | 12.65 | 0.75198 |
|  |  | 12.75 | 3.748E-4 | 12.75 | 0.75121 |
|  |  | 12.85 | 2.994E-4 | 12.85 | 0.75126 |
|  |  | 12.95 | 2.839E-4 | 12.95 | 0.75285 |
|  |  | 13.05 | 2.528E-4 | 13.05 | 0.7542  |
|  |  | 13.15 | 2.063E-4 | 13.15 | 0.75376 |
|  |  | 13.25 | 1.885E-4 | 13.25 | 0.75178 |
|  |  | 13.35 | 1.907E-4 | 13.35 | 0.75362 |
|  |  | 13.45 | 1.464E-4 | 13.45 | 0.74974 |
|  |  | 13.55 | 1.486E-4 | 13.55 | 0.75263 |
|  |  | 13.65 | 1.175E-4 | 13.65 | 0.75337 |
|  |  | 13.75 | 1.53E-4  | 13.75 | 0.75215 |
|  |  |       |          | 13.85 | 0.7505  |
|  |  |       |          | 13.95 | 0.75256 |

## 12. Figure 9

| Effect of $\varepsilon_{ps}$ on (a) the interpenetration $I$ and (b) the average number of contact pairs $\langle N_{pair} \rangle$ |         |         |                            |          |          |
|-------------------------------------------------------------------------------------------------------------------------------------|---------|---------|----------------------------|----------|----------|
| $I$                                                                                                                                 |         |         | $\langle N_{pair} \rangle$ |          |          |
| $\varepsilon_{ps}$                                                                                                                  | ring    | linear  | $\varepsilon_{ps}$         | ring     | Linear   |
| 2                                                                                                                                   | 0.43561 | 0.61097 | 2                          | 35.78554 | 35.85314 |
| 3                                                                                                                                   | 0.43856 | 0.60819 | 3                          | 36.00459 | 36.01417 |
| 4                                                                                                                                   | 0.44092 | 0.61356 | 4                          | 36.31917 | 36.12198 |
| 5                                                                                                                                   | 0.44823 | 0.60948 | 5                          | 36.54315 | 36.16955 |
| 6                                                                                                                                   | 0.4527  | 0.61436 | 6                          | 36.77662 | 36.36835 |
| 8                                                                                                                                   | 0.46488 | 0.62819 | 8                          | 37.17218 | 36.6558  |
| 10                                                                                                                                  | 0.4887  | 0.64412 | 10                         | 37.6748  | 37.06305 |
